# 1 Utilising hippocampal neuronal calcium activity in mouse CA1 for a 2 multimodal optical brain-computer interface

3

4 **Dechuan Sun<sup>a,b</sup>, Forough Habibollahi Saatlou<sup>a</sup>, Yang Yu<sup>b</sup>, Ranjith Rajasekharan Unnithan<sup>b</sup>, Chris French<sup>a,\*</sup>**

5 a. Department of Medicine, The University of Melbourne, Victoria, Australia

6 b. Department of Electrical and Electronic Engineering, The University of Melbourne, Victoria, Australia

7

8

## 9 **Abstract**

10 The hippocampus has been proposed to integrate information from multiple sensory modalities,  
11 supporting a comprehensive “cognitive map” for both spatial and non-spatial information.  
12 Previous studies have demonstrated decoding of hippocampal spatial information in real time  
13 by recording neuronal action potentials with electrodes. However, decoding of hippocampal  
14 non-spatial information robustly in real-time has not been previously shown. Here, we utilise  
15 the advantages of widefield optical calcium imaging to construct an optical brain-computer  
16 interface (BCI) driven by calcium activity of large neuronal ensembles (~600 neurons) to  
17 decode spatial, visual and auditory information effectively in real time. We developed a high  
18 speed end-to-end analysis workflow with advanced machine learning techniques for decoding.  
19 This methodology achieves high decoding accuracy and provides a “cognitive translation”  
20 approach that may be applied to both research and clinical applications to allow direct neural  
21 communication with animals and patients with impairment of function.

22

## 23 **1. Introduction**

24 The hippocampus, embedded deep within the temporal lobe, connects with many other brain  
25 structures directly or indirectly and plays important roles in memory and cognition. It has been  
26 demonstrated to support a “cognitive map”, providing an environment-centric spatial memory

27 system ([O'keefe and Nadel, 1978](#); [Spiers et al., 2020](#)). Apart from encoding spatial information,  
28 previous studies have revealed that the hippocampal neuronal network also encodes non-spatial  
29 information such as visual ([Acharya et al., 2016](#); [Liu et al., 2018](#)), auditory ([Moita et al., 2003](#);  
30 [Itskov et al., 2012](#); [Xiao et al., 2018](#)), odour ([Komorowski et al., 2009](#); [Taxidis et al., 2020](#)),  
31 gustatory ([Ho et al., 2011](#)), and tactile information ([Pereira et al., 2007](#); [Gener et al., 2013](#)).  
32 These intriguing observations indicate a more abstract and comprehensive hippocampal  
33 cognitive map, generating a high-dimensional space for both spatial and non-spatial  
34 information. Accurately decoding the hippocampal cognitive map in real time would  
35 significantly enhance direct neural communication (“cognitive decoding”) in both  
36 experimental and clinical scenarios.

37 Hippocampal spatial information has previously been decoded in real time using  
38 electrophysiological signals ([Guger et al., 2011](#); [Sodkomkham et al., 2016](#); [Ciliberti et al., 2018](#);  
39 [Hu et al., 2018](#)). However, whether it is possible to decode hippocampal non-spatial  
40 information in real time has not yet been studied, possibly due to limitations on the number of  
41 electrophysiological recording channels, complicated and time-consuming analyses pipelines,  
42 and relatively low sensitivity of hippocampal neurons to non-spatial information. Additionally,  
43 the electrodes often shift and the signal tends to attenuate over time.

44 Here, we describe an optical brain-computer interface (OBCI) based on a single-photon  
45 imaging technique (“miniscope”, [Ghosh et al., 2011](#)) to decode hippocampal spatial, visual,  
46 and auditory information in three experiments. First, spatial position was assessed with the  
47 animals traversing a linear track. In the second and third experiments, the animals were placed  
48 into a chamber and passively exposed to light stimuli or pure sinusoidal tones centred at three  
49 different frequencies. The OBCI detects activity of very large neuronal ensembles and provides  
50 stable calcium activity for very long time periods. Instead of implementing traditional BCI  
51 analysis pipelines to detect action potentials, we developed an end-to-end workflow using the

52 raw calcium activity data together with machine learning models for decoding without inferring  
53 neuron spikes. To the best of our knowledge, this is a unique methodology in OBCI  
54 implementation. Our analysis pipelines offer considerable promise for interpreting this high  
55 bandwidth multimodal dataset. We achieved a decoding error of  $9.33 \pm 0.67$  cm/frame (mean  
56  $\pm$  standard error mean) in position reconstruction experiments, a decoding error ratio of 3.36%  
57  $\pm$  1.47% in visual stimuli identification experiments, and 17.83%  $\pm$  2.32% in auditory stimuli  
58 identification experiments. This study presents for the first time a proof of concept for decoding  
59 the hippocampal cognitive map in real time for “cognitive decoding” using an end-to-end  
60 optical brain computer interface.

61

## 62 **2. Materials and Methods**

63 All procedures were approved by the Florey Animal Ethics Committee (No. 18-008UM),  
64 subject to the restrictions contained in the Australian Code for the Care and Use of  
65 Animals for Scientific Purposes, 8th Edition.

### 66 **2.1 Animals and surgery**

67 C57BL/6J mice (8 weeks old) were used in the experiment and underwent two stereotaxic  
68 surgeries under anaesthesia (isoflurane: 3%–5% induction, 1.5% maintenance). Mice were first  
69 unilaterally injected with 500nl of pAAV.Syn.GCaMP6f.WPRE.SV40 virus (#100837-AAV1,  
70 AddGene) in dorsal CA1 (right hemisphere, 2.1 mm posterior to the bregma, 2.1 mm lateral to  
71 the midline, and 1.65mm ventral from the surface of skull) over a 15 min period. One week  
72 following the injection, two anchor screws were secured to the skull and a circular craniotomy  
73 2mm in diameter was made next to the injection site (2.1 mm posterior to the bregma, 1.6 mm  
74 lateral to the midline). The cortex above the corpus callosum was aspirated using a 27-gauge

75 blunt needle and a vacuum pump, and a 1.8mm diameter GRIN lens (#64-519, Edmund Optics)  
76 was implanted at a depth of 1.35mm from the surface of the skull. Cyanoacrylate glue and  
77 dental acrylic were used to fix the lens in place, and the lens was protected by silicone adhesive  
78 (Dragon Skin® Series). The mice were given analgesics (carprofen:5mg/kg; dexamethasone:  
79 0.6mg/kg) and enrofloxacin water (1:150 dilution, Baytril®) to recover for seven days. The  
80 neuronal calcium activity was examined 4-5 weeks later. After finding the best field of view, a  
81 baseplate was cemented on the animal's head and a plastic cap was locked into the baseplate  
82 to protect the lens (**Fig 1a-c**).

## 83 **2.2 Information content and sensitive neurons**

84 Information content is a measure to quantify the precision level of neuronal coding; a larger  
85 value indicates more precise coding. In the position reconstruction experiment, the definition  
86 of information content is similar to that described in [Ravassard et al. \(2013\)](#) and [Rubin et al.](#)  
87 [\(2015\)](#), but the measurement “neuronal firing rate” is changed to “neuronal fluorescent  
88 intensity” to adapt to our recording technique,

$$89 \quad I = \frac{r_i}{\bar{r}} \log_2 \frac{r_i}{\bar{r}}, \quad \bar{r} = \sum_{i=1}^k p_i r_i,$$

90 where  $I$  represents the information content,  $i$  is the spatial bin index,  $k$  is the number of spatial  
91 bins,  $p_i$  is the probability of occupancy of the  $i^{\text{th}}$  bin,  $r_i$  is the average fluorescent intensity in  
92 the  $i^{\text{th}}$  bin and  $\bar{r}$  is the overall mean fluorescent intensity. We next shuffled the animal's  
93 location, and the information content was recomputed for each shuffle. This step was repeated  
94 1000 times, and a neuron was marked as a location sensitive neuron if its information content  
95 in the unshuffled trial exceeded 95% of the shuffled trials.

96 In visual and auditory stimuli experiments, the definition of the information content was the  
97 same, but the data binning was implemented in the temporal domain. There were two states  
98 (light or dark) in the visual experiment, and three states (three different frequencies) in the

99 auditory experiment. We used the same shuffling method to detect light and sound sensitive  
100 neurons.

101

## 102 **2.3 Calcium activity decoder**

103 We tested and compared the performance of several decoders to decode the neural signals  
104 including a Gaussian naïve Bayes (GNB) decoder, a support vector machine (SVM) decoder, a  
105 multilayer perceptron (MLP) neural network model, a long short-term memory (LSTM) neural  
106 network model, and a convolutional neural network (CNN) model. The decoders were  
107 constructed and implemented on the Python platform using the scikit-learn tool kit ([Pedregosa  
108 et al., 2011](#)) and tensorflow library ([Abadi et al., 2016](#)).

109 The GNB decoder is a type of probabilistic-based prediction algorithm based on Bayes’  
110 theorem. In the position reconstruction experiment, raw fluorescent intensities of location  
111 sensitive neurons were first normalized to remove the mean and scaled to unit variance. Given  
112 a sequence of fluorescent intensities from location sensitive neurons in each frame, the  
113 estimated position  $\hat{y}$  was defined as,

$$114 \quad \hat{y} = \arg \max_y P(y) \prod_{i=1}^N P(x_i|y)$$

$$115 \quad P(x_i|y) = \frac{1}{\sqrt{2\pi\sigma_y^2}} e^{-\frac{(x_i - \mu_y)^2}{2\sigma_y^2}}$$

116 where  $P(y)$  is the probability of occupancy of bin  $y$ ,  $x_i$  is the normalized fluorescent intensity  
117 of the  $i^{\text{th}}$  neuron, and  $\mu_y$  and  $\sigma_y$  represent the mean and standard deviation of the normalized  
118 fluorescent intensity of the  $i^{\text{th}}$  neuron at bin  $y$ , respectively. In the visual stimuli experiment,  $y$   
119 represents either light-bin or dark-bin. In the auditory stimuli experiment,  $y$  represents the bins  
120 with different stimulus frequencies.

121 The SVM decoder performs classification by constructing a set of hyperplanes that maximizes  
122 the margins between different classes. The SVM model was trained and constructed using the  
123 normalized input data with a non-linear radial basis function kernel. The kernel width, gamma,  
124 was set to be the reciprocal of the number of input features. A cost parameter “C” was  
125 optimized by applying a grid search technique with five-fold cross-validation.

126 An MLP is an artificial neural network that is commonly used in solving the problems of  
127 prediction and classification. It shows excellent performance when the input data is not linearly  
128 separable. The MLP neural network constructed in our experiments contained one input layer,  
129 two hidden layers activated by a rectified linear unit (ReLU) function, and one output layer  
130 with softmax activation. The input data was normalized and fed into the model. We used an  
131 Adam optimizer and a categorical cross-entropy loss function to compile the model. The batch  
132 size was set to be 32 and all the other hyperparameters including the number of nodes in hidden  
133 layers, learning rate, the number of epochs were optimized by implementing a grid search  
134 method using five-fold cross-validation.

135 An LSTM model is a type of recurrent neural network that can use internal memory to process  
136 sequences of data with variable length and has shown notable success in time series forecasting.  
137 The LSTM model was implemented to reconstruct the animal’s running trajectory in our  
138 experiments. The model consisted of one input layer, two fully connected LSTM layers  
139 activated by a ReLU function, a dropout layer (dropout rate: 0.2) that prevented overfitting,  
140 and one output layer with a softmax activation function. In the position reconstruction  
141 experiment, the output of the model was marked as the animal’s current location bin, and we  
142 tested different lengths of normalized time-series data to build and train the model. The same  
143 method as the MLP neural network was used to compile and tune the hyperparameters of the  
144 model.

145 A CNN is a class of artificial neural network that has been frequently implemented in image  
146 processing, but also shows good performance for time series data. It is designed to detect spatial  
147 hierarchies of features in the input data. We tested a CNN model to decode the hippocampal  
148 activity in auditory stimuli experiments. The inputs were the time series of raw fluorescent  
149 intensities from sensitive neurons. The model contained two convolutional layers with ReLU  
150 activations, with a max-pooling layer added after each convolutional layer for dimensionality  
151 reduction. A dropout layer (dropout rate: 0.2) was then concatenated to prevent overfitting.  
152 Finally, a fully connected layer with a softmax activation function was added to output the  
153 probability distribution for each class. A grid search method was performed to determine the  
154 hyperparameters that yielded the highest decoding accuracy.

## 155 **2.4 Kalman filter**

156 In the position reconstruction experiment, we used a Kalman filter to reduce the decoding  
157 noise in the outputs of the decoder. The Kalman filter is one of the most widely used methods  
158 for position tracking and estimation. To estimate the state  $\hat{x}_t$  [position and velocity] of the  
159 animal at time  $t$ , the estimation processes are defined as:

160 Time update:

$$161 \quad \hat{x}_{\bar{t}} = A\hat{x}_{t-1} + Bu_{t-1}$$

$$162 \quad P_{\bar{t}} = AP_{t-1}A^T + Q$$

163 Measurement update:

$$164 \quad K_t = P_{\bar{t}}H^T(HP_{\bar{t}}H^T + R)^{-1}$$

$$165 \quad P_t = (I - K_tH)P_{\bar{t}}$$

$$166 \quad \hat{x}_t = \hat{x}_{\bar{t}} + K_t(z_t - H\hat{x}_{\bar{t}})$$

167 
$$A = \begin{bmatrix} 1 & \Delta t \\ 0 & 1 \end{bmatrix}, B = \begin{bmatrix} \frac{1}{2}\Delta t^2 \\ \Delta t \end{bmatrix}, H = [1 \ 0]$$

168 where  $\hat{x}_{\bar{t}}$  is the prior estimation of the state,  $P_{\bar{t}}$  is the prior transition covariance,  $K_t$  is the  
169 Kalman gain,  $P_t$  is the updated transition covariance,  $\hat{x}_t$  is the updated state,  $u_{t-1}$  is the  
170 acceleration,  $Q$  is the transition covariance and  $R$  is the observation covariance. The sampling  
171 frequency is 30 fps, so  $\Delta t$  equals 1/30. The initial values of the state were set to be zero and the  
172 transition covariance matrix was set to be identity. The values of  $Q$  and  $R$  were set to be 0.0001  
173 and 1, respectively.

174

## 175 **2.5 Experimental procedures and analysis method**

176 The experiment contained two sessions: (1) a training session and (2) a real-time session. The  
177 training session was implemented offline to detect the location of sensitive neurons from the  
178 raw calcium images and to construct the decoding model. In the real-time session, we used the  
179 decoding model constructed in the training session to decode the neuronal activity directly.

### 180 **2.6.1 Real-time position reconstruction**

181 Before the experiment, the mice were kept on a dietary restriction and their body weights were  
182 maintained at 85% of free-feeding body weights. We trained the mice with the miniscope  
183 attached to traverse a 1.6m linear track for food rewards. The mice were required to complete  
184 12 trials of traversing each day for one week.

185 Training session:

186 On the day of the training session experiment, we first recorded the hippocampal calcium  
187 activity when the mouse traversed the linear track for 12 trials. The sampling frequency of the  
188 miniscope was set to 30 fps and the animal's position was tracked using a video camera



189 mounted above the linear track that was synchronized with the miniscope recording system.  
190 After recording, the translational frame shifting was corrected using a cross-correlation-based  
191 image registration algorithm (Guizar-Sicairos et al., 2008). The spatial footprints of neurons in  
192 the field of view were detected by implementing a constrained nonnegative matrix factorization  
193 for endoscopic recordings (CNMF-E) algorithm (Zhou et al., 2018; Fig 1d). The CNMF-E  
194 could effectively detect neurons in different layers, leading to the overlap of the neuronal  
195 footprints. To decrease interference from surrounding neurons, we used the centroid of each  
196 neuron and a small surrounding area to extract their calcium activity. For each neuron, the raw  
197 calcium activity was defined as the average fluorescent intensity of the centroid pixel and the  
198 surrounding eight pixels (Fig 1e). To quantify the spatial information content, the linear track  
199 was sectioned into 80 bins of 2cm and the time spent in each bin was measured. We then  
200 calculated the spatial information content of each neuron and detected the location-sensitive  
201 neurons using a shuffling method. Next, the calcium activity of location-sensitive neurons was  
202 used to construct a decoding model to assess how well the calcium activity of neuronal  
203 ensembles predicted the animal's location. We tested and compared the performance of a GNB  
204 decoder, an SVM decoder, an MLP neural network model, and an LSTM neural network model.  
205 Finally, a Kalman filter was used to reduce the decoding noise from the outputs of the decoder.  
206 The best decoder together with the Kalman filter was subsequently deployed in the real-time  
207 session.

208 Real-time session:

209 In the real-time session, the mouse traversed the linear track for 12 trials. The position of the  
210 mouse was tracked by a video camera, but it was only used later to assess the decoding accuracy.  
211 The same image registration method was implemented to align the image and the raw calcium  
212 activity of position sensitive neurons detected in the training session was extracted and fed into  
213 the decoder to reconstruct the animal's running trajectory in real time.

## 214 **2.6.2 Visual and auditory stimuli identification**

215 We separately studied hippocampal activity evoked by visual stimuli and auditory stimuli. The  
216 mouse was put in a small opaque recording chamber and was exposed to either a flashlight or  
217 a speaker mounted above the chamber.

218 Training session:

219 On the day of the training session experiment, we placed the mouse in the chamber 15 minutes  
220 before recording to acclimate. We used a Raspberry Pi 3 (Model B) board to control a flashlight  
221 or a speaker. In the visual stimuli experiment, the flashlight was turned on 2s and off 2s  
222 alternately 150 times. In the auditory stimuli experiment, the speaker played three different  
223 frequency tones (4kHz, 8kHz, 16kHz) randomly 225 times with an activation-period of 2s and  
224 a mute-period of 3s. The data was analysed using the same procedure described in the position  
225 reconstruction experiment: (1) image registration, (2) neuron centroid detection, (3) raw  
226 calcium activity extraction, (4) sensitive neuron detection, and (5) decoder construction. We  
227 tested and compared the performance of a GNB decoder, an SVM decoder, and an MLP neural  
228 network model. In the auditory stimuli experiment, none of these three decoders showed  
229 outstanding performance (see Results), so we divided the data into several epochs for further  
230 analysis. The time length of the epoch was 5s, which included the speaker activation and  
231 deactivation periods. Finally, we constructed a CNN model to decode the epoch data.

232 Real-time session:

233 In the real-time session, the mouse was exposed to light stimuli 150 times or sound stimuli 80  
234 times. The raw calcium activity of stimuli sensitive neurons detected in the training session  
235 was extracted after image registration and was provided to the decoder. An MLP model or an  
236 SVM model was deployed in the visual stimuli experiment and a CNN model was deployed in  
237 the auditory stimuli experiment to do the subsequent real-time decoding.

## 238 **2.6 Noise level and firing rate map similarity**

239 The noise level was used to characterize the noise coupled in the calcium dynamics and the  
240 background noise. The raw calcium activity was first processed with a zero-phase infinite  
241 impulse response lowpass filter (1Hz cut-off frequency, filter order:20), and the signal noise  
242 level was defined as the difference between the raw calcium activity and the filtered activity.

243 To compare the consistency or the similarity of the firing rate map between the training session  
244 and the real-time session, we measured the normalized cross-correlation ([Lewis, 1995](#))

$$245 \quad R(u, v) = \frac{\sum_{xy} [m(x, y) - \bar{m}_{u,v}] [n(x - u, y - v) - \bar{n}]}{\sqrt{\sum_{xy} [m(x, y) - \bar{m}_{u,v}]^2 \sum_{xy} [n(x - u, y - v) - \bar{n}]^2}}$$

246 where  $m$  and  $n$  represent the firing rate maps in the training session and the real-time session,  
247  $x$  and  $y$  represent the pixels in the maps, and  $u$  and  $v$  represent the pixel shift along different  
248 dimensions in each map, respectively.

249

## 250 **3. Results**

251 We constructed an optical brain-computer interface (OBCI) to decode mouse hippocampal  
252 calcium activity in real time in response to different sensory modality stimulation. We  
253 compared the performance of several decoders using the training data and separately measured  
254 real time decoding accuracy in a position reconstruction experiment (n=3 mice), a visual  
255 stimuli identification experiment (n=3 mice), and an auditory stimuli identification experiment  
256 (n=3 mice).

### 257 **3.1 Position reconstruction**

258 To investigate whether the raw hippocampal calcium activity could be decoded to reconstruct  
259 a mouse's moving trajectory in real time, we tested three mice separately in a 1.6m linear track.  
260 A camera was synchronized with the miniscope recording system to capture the mouse's  
261 running trajectory during the experiments. Each mouse first underwent a training session to  
262 construct the position reconstruction model. A large population of hippocampal neurons was  
263 observed in each mouse (n = 781, 478, 622, respectively). We measured the spatial information  
264 content of each neuron and detected the position sensitive neurons (n = 322, 320, 250,  
265 respectively) using a shuffling method (see Methods). An example of the place field map of  
266 sensitive neurons is shown in **Fig 3a**. The raw fluorescent intensities of sensitive neurons were  
267 used as "selected features" to train the position reconstruction model. We separately tested and  
268 compared the performance of a GNB decoder, an SVM decoder, an MLP neural network, and  
269 an LSTM neural network. To eliminate the reconstruction outliers, a Kalman filter was  
270 cascaded at the end (see Methods). Using five-fold cross-validation, we optimized the  
271 hyperparameters of each model and measured the reconstruction errors (summarized in  
272 **Supplementary Table 1**). All models could reconstruct the mice's running trajectories  
273 accurately. The GNB decoder showed the highest decoding error (mean:  $22.79 \pm 3.42$  cm/frame;  
274 median:  $16.00 \pm 2.64$  cm/frame), while the other three decoders achieved better performance  
275 with similar decoding errors (mean:  $\sim 14$  cm/frame; median:  $\sim 11$  cm/frame, **Fig 3b-c**). An  
276 example of the position reconstruction using the training data is shown in **Fig 3d**. Intriguingly,  
277 different firing patterns of sensitive neurons were observed and the running trajectory could be  
278 described in a high-dimensional neural state space (**Supplementary Fig 4.a,d**). Next, the  
279 decoding model showing the best performance was prepared to deploy in the real-time session.  
280 In the real-time session, the raw fluorescent intensities of location sensitive neurons detected  
281 in the training session were extracted and fed into the decoding model. We additionally plotted  
282 the place field map of location sensitive neurons in the real-time session, and all neurons

283 showed clear specific firing locations (**Fig 3e**). We achieved a low average decoding error of  
284  $13.65 \pm 0.50$  cm/frame (13.20, 13.09, and 14.65 cm/frame, respectively) and a low median  
285 error of  $9.33 \pm 0.67$ cm/frame (8.00, 10.00, and 10.00 cm/frame). An example of the trajectory  
286 reconstruction is shown in **Fig 3f-g** and **Supplementary Fig 1a-b**.

287 We compared the noise levels of the signals in the training session and real-time session and  
288 did not detect significant differences (**Fig 4a-b**). The cross-correlation of place field maps  
289 between the two sessions showed a peak correlation value on the origin of the coordinate (**Fig**  
290 **4c**), indicating stable neuronal firing patterns across sessions. We additionally tested the effects  
291 of LSTM window sizes. A 5-frame (~0.17s) window size could provide an accurate decoding  
292 accuracy, while a 20-frame window size achieved much worse performance (**Fig 4d**). To test  
293 the effects of neuron numbers on the decoding accuracy, we compared the decoding accuracy  
294 using 20%, 40%, 60%, 80%, and 100% of sensitive neurons. Using more neurons in the  
295 reconstruction led to decreased decoding error (**Fig 4e**). Finally, we measured the processing  
296 time using different models and percent of neurons. The SVM model consumed considerably  
297 more time in processing each data frame (~5ms using 100% sensitive neurons), while all the  
298 other models showed very fast processing speed (~0.2ms using 100% sensitive neurons; **Fig**  
299 **4f**).

300

### 301 **3.2 Visual stimuli identification**

302 We next studied whether the hippocampal neural ensemble activity could be decoded to  
303 identify visual inputs. A flashlight fixed on top of the recording chamber was switched on and  
304 off alternately, which was synchronized with the miniscope recording system. Three mice were  
305 tested individually in the experiment and each mouse first experienced a training session to  
306 construct the decoding model. There were 536, 707, and 569 neurons in the fields of view,

307 respectively. The neuronal fluorescent intensity in light and dark environments showed similar  
308 distributions (**Supplementary Fig 2c**). The information content was then measured for each  
309 neuron, and we detected 204, 392, and 407 sensitive neurons in each mouse. An example of  
310 the average neuronal activity of sensitive neurons in light and dark epochs is shown in **Fig 5a**,  
311 while many neurons displayed strong responses during light-to-dark transient. We then tested  
312 the performance of a GNB decoder, an SVM decoder, and an MLP neural network to identify  
313 the visual inputs based on the training data. **Supplementary Table 2** summarizes the decoding  
314 accuracy of different models. The SVM decoder and MLP neural network both achieved very  
315 high decoding accuracy (mean decoding error: ~3%), which was much higher than that using  
316 a GNB decoder (mean decoding error:  $20.54\% \pm 8.70\%$ ). An example of the performance of  
317 different models is shown in **Fig 5b**. Again, different firing patterns of sensitive neurons were  
318 observed and were distinguishable in a high-dimensional neural state space (**Supplementary**  
319 **Fig 4.b,e**). The model showing the best performance was applied in each mouse respectively in  
320 the real-time session.

321 In the real-time session, the raw calcium signals of sensitive neurons were used to predict the  
322 visual inputs. Intriguingly, the average neuronal firing patterns looked different from those in  
323 the training session (**Fig 5c**) but decoding errors were very low in all three mice, which were  
324 5.47%, 4.07%, and 0.53%, respectively (overall:  $3.36\% \pm 1.47\%$ ). Examples of the decoding  
325 performance are shown in **Fig 5d** and **Supplementary Fig 2a-b**.

326 The noise levels of the signals in the training sessions and the real-time sessions did not show  
327 significant differences (**Fig 6a-b**). The maximum cross-correlation value of firing rate maps  
328 between the two sessions was not on the origin of the coordinate in this experiment, showing  
329 a shift along the time axis (**Fig 6c**). Considering more neurons resulted in higher decoding  
330 accuracy as observed in the position reconstruction experiment (**Fig 6d**). Because the decoding

331 model was simpler than that in the position reconstruction experiment, the MLP model only  
332 required about 0.01ms to process the data in each frame (**Fig 6e**).

333

### 334 **3.3 Auditory stimuli identification**

335 To determine whether the hippocampal calcium activity could be decoded to distinguish the  
336 frequency of auditory stimuli, we exposed mice (n=3) to pure sinusoidal tones centred at 4kHz,  
337 8kHz, or 16kHz. The speaker was activated and deactivated alternately, synchronizing with the  
338 miniscope recording system. In the training session, we observed 534, 619, and 599 neurons in  
339 each mouse, respectively. The animals experienced four different environments (mute, 4kHz,  
340 8kHz, and 16kHz) in the experiment. We first attempted to use a GNB decoder, an SVM  
341 decoder, and an MLP neural network to identify the auditory input in each frame, but all the  
342 decoders failed to make accurate predictions. **Supplementary Table 3** summarizes the  
343 decoding error of each model, and several examples are shown in **Fig 7a**. We next sectioned  
344 the data into epochs according to the frequency of stimuli, and each epoch contained a 2s  
345 sound-on period followed by a 3s sound-off period. The neuronal fluorescent intensity in  
346 different audio frequency epochs showed similar distributions (**Supplementary Fig 3c**), but  
347 we detected 198, 227, and 230 sensitive neurons in each mouse, respectively. An example of  
348 the average neuronal activity of sensitive neurons in different environments is shown in **Fig 7b**.  
349 We then trained a CNN model to identify the frequency of each epoch. The CNN model  
350 achieved high decoding accuracy with an error rate of 17.67%, 22.76%, and 22.89% in each  
351 mouse, respectively (mean  $\pm$  SEM: 21.11%  $\pm$  1.48%), based on the training data. An example  
352 of CNN performance is shown in **Fig 7c**. Again, different temporal firing patterns of sensitive  
353 neurons were observed, showing diverse features in a high-dimensional neural state space  
354 (**Supplementary Fig 4.c,f**).

355 In the real-time session, the CNN model constructed in the training session was deployed to  
356 decode the raw calcium activity of sensitive neurons. The average temporal firing patterns  
357 looked similar to those in the training session (**Fig 7d**). The decoding error ratio was 13.25%,  
358 20.78% and 19.48% in each mouse, respectively (overall:  $17.83\% \pm 2.32\%$ ). An example of  
359 the decoding performance is shown in **Fig 7e** and **Supplementary Fig 3a-b**.

360 The signals in the training and real-time sessions showed similar noise levels (**Fig 8a-b**). The  
361 cross-correlation of the firing rate maps between the two sessions showed several peaks with a  
362 dominant peak on the origin of the coordinate (**Fig 8c**), indicating relatively consistent temporal  
363 firing patterns across sessions. Likewise, using all sensitive neurons achieved the highest  
364 decoding accuracy (**Fig 8d**) and the model consumed about 1.6ms to process the 5s epoch data  
365 using a CNN model (**Fig 8e**).

366

## 367 **Discussion**

368 We have developed an optical brain-computer interface (OBCI) driven by calcium activity to  
369 decode separate sensory modality stimulation from hippocampal neuronal activity in mice. Our  
370 low-latency end-to-end analysis pipeline provides accurate decoding of both hippocampal  
371 spatial and non-spatial information, which facilitates direct neural communication.

372

## 373 **Hippocampal multi-sensory integration**

374 The hippocampus supports a diverse cognitive map that incorporates both spatial and non-  
375 spatial information. Thus this structure may be a useful target to implement brain-computer  
376 interfaces to decode information from multi-sensory modalities, unlike other brain regions such  
377 as the visual cortex or auditory cortex that encode more specific sensory information.



378 The projection pathways of sensory information to the hippocampus differ anatomically.  
379 Spatial information mainly targets the dorsal and posterior hippocampus (Strange et al., 2014).  
380 Previous work using electrophysiological data was able to extract spatial information from the  
381 hippocampus in real time with a small set of neurons. Guger et al. (2011), Sodkomkham et al.  
382 (2016), and Hu et al. (2018) reconstructed the running trajectory of rats in real time by  
383 recording hippocampal action potentials.

384 Non-spatial information mostly flows into the ventral and anterior hippocampus (Strange et al.,  
385 2014). The visual signal projects to the hippocampus from the visual cortex through a multi-  
386 synaptic pathway (Lavenex and Amaral, 2000; Ranganath and Ritchey, 2012). Additionally,  
387 Haggerty and Ji (2015) observed the synchrony between activity of hippocampal neurons and  
388 visual cortical neurons in freely moving rats. The transmission pathways between the  
389 hippocampus and auditory cortex are more complex. It is believed that there are two major  
390 pathways – the lemniscal pathway and the non-lemniscal pathway, and the auditory signalling  
391 to hippocampus has likely undergone several integrative stages (Munoz-Lopez et al., 2010;  
392 Xiao et al., 2018). These studies demonstrate the complex connectivity basis of highly  
393 processed multi-sensory encoding in the hippocampus and provide insight into the difficulty  
394 of decoding these integrated signals.

395

## 396 **Decoding models**

397 We tested different machine learning models to decode the hippocampal cognitive map  
398 including a GNB model, an SVM model, an MLP model, an LSTM model, and a CNN model.  
399 In all experiments, the GNB model showed the highest decoding error, which might be due to  
400 the nonlinearity of the hippocampal neuronal network and that the cognitive map was described

401 in complex high-dimensional spaces. But on the other hand, these results are not surprising,  
402 because it was not straightforward to determine appropriate priors for the GNB model.

403 Intriguingly, in both position reconstruction and visual stimuli identification experiments, MLP  
404 and SVM models showed similar decoding performance in all animals. Compared with an MLP  
405 model, an SVM model has the advantage of fewer hyper-parameters to optimize. Additionally,  
406 an SVM model can be trained in an online mode ([Jain et al., 2014](#); [Laskov et al., 2006](#)), which  
407 avoids a separate training session.

408 The long short-term memory (LSTM) algorithm is an artificial recurrent neural network that  
409 can achieve good prediction accuracy from time-series data ([Rezaei et al., 2018](#); [Tampuu et al.,](#)  
410 [2019](#)). It simulates a biologically relevant model of how neuronal activity is processed.  
411 However, it did not show the best performance in the position reconstruction experiment, which  
412 was somewhat surprising. A possible explanation may be the slow kinetics of neuronal calcium  
413 activity. Action potentials cause calcium influx and efflux in excitable cell bodies, and the  
414 depolarization-evoked neuronal firing has a long-lasting effect on calcium activity. This  
415 indicates that the calcium activity in the current frame inherits partial information encoded in  
416 previous frames, which as a result weakens the strength of memory units in the model.  
417 Intriguingly, incorporating too much history (very old information) in an LSTM network  
418 causes a drop in its performance because that information may not be relevant or useful or may  
419 introduce unwanted noise.

420 Spatial and visual information could be decoded accurately in each frame in the experiments.  
421 However, a relatively long-time window was needed to decode the auditory information. This  
422 may be due to the different encoding mechanisms of hippocampal neurons for different types  
423 of sensory information. Auditory-evoked neuronal activation has been reported to exhibit  
424 variable latencies ([MacDonald et al., 2011](#); [Itskov et al., 2012](#)), resulting in long-lasting

425 temporal firing patterns. Another explanation may be the relatively low absolute sensitivity of  
426 CA1 neurons to auditory stimuli (Moita et al., 2003; Itskov et al., 2012), necessitating the  
427 highly optimised signal analysis techniques needed for this task.

## 428 **Optical Brain-Computer Interfaces (OBCIs)**

429 Conventional intracranial brain-computer interfaces (BCIs) use electrode arrays to record  
430 neuronal action potentials or local field potentials. More recently, the potential for calcium  
431 imaging using multiphoton of neuronal ensembles as a BCI has been examined (Clancy et al.,  
432 2014; Trautmann et al. 2021). The relationship between neuron action potentials and calcium  
433 activity is complex. An action potential activates voltage-gated calcium channels, eliciting a  
434 nonlinear rise in intracellular calcium concentration. Although the dynamics of calcium activity  
435 is relatively slow, it has been shown to track action potential frequency (Harding et al., 2020).  
436 In our experiments, we used GCaMP6f with relatively fast kinetics (~50ms temporal resolution;  
437 Chen et al., 2013). Thus, the temporal resolution of calcium signals seems functionally  
438 comparable to electrical signals.

439 Clancy et al. (2014) utilized volitional control of a small number of neurons identified with  
440 two-photon imaging that could indirectly control the sound from a speaker. Trautmann et al.  
441 (2021) implemented a two-photon OBCI in a head-fixed macaque for detection of the animal's  
442 arm motion. In contrast, our technique uses single-photon imaging, which in practice can detect  
443 many more neurons, allowing directly decoding of spatial, light and sound modalities at high  
444 precision in real time. These remarkable capabilities derive from the use of a large neural  
445 dataset, allowing the use of machine learning algorithms for very low latency signal processing.  
446 Additionally, this workflow is low-cost and does not require bulky equipment.

447 In summary, we constructed an OBCI system and successfully decoded spatial, visual, and  
448 auditory information from the mouse hippocampus. The end-to-end OBCI system proposed

449 here presents a proof of concept for decoding the hippocampal cognitive map in real time. It  
450 expands the method and opportunity to study the activity of hippocampal neuronal ensembles  
451 and will be helpful for future content-specific closed-loop BCI experiments. Furthermore, it  
452 provides an approach for “cognitive decoding”, which may be applied in clinical applications  
453 and scientific research in the future.

454

## 455 **Author Contributions**

456 D.S., R.R.U and C.F. conceived and designed the study. D.S. carried out the experiment,  
457 processed the data, and drafted the manuscript. F.H. and Y.Y processed the data. R.R.U and  
458 C.F supervised the project and did critical manuscript revision. All authors have read and  
459 approved the final manuscript.

460

## 461 **Conflict of Interest**

462 The authors declare that the research was conducted in the absence of any commercial or  
463 financial relationships that could be construed as a potential conflict of interest.

464

## 465 **Data availability statement**

466 All data supporting the findings of this study are available from the corresponding authors upon  
467 reasonable request.

468

## 469 **Funding**

470 This work was supported by Royal Melbourne Hospital Neuroscience Foundation (A2087) and

471 Australian Research Council under Discovery Project (DP170100363).

472

473 **Figure**

474

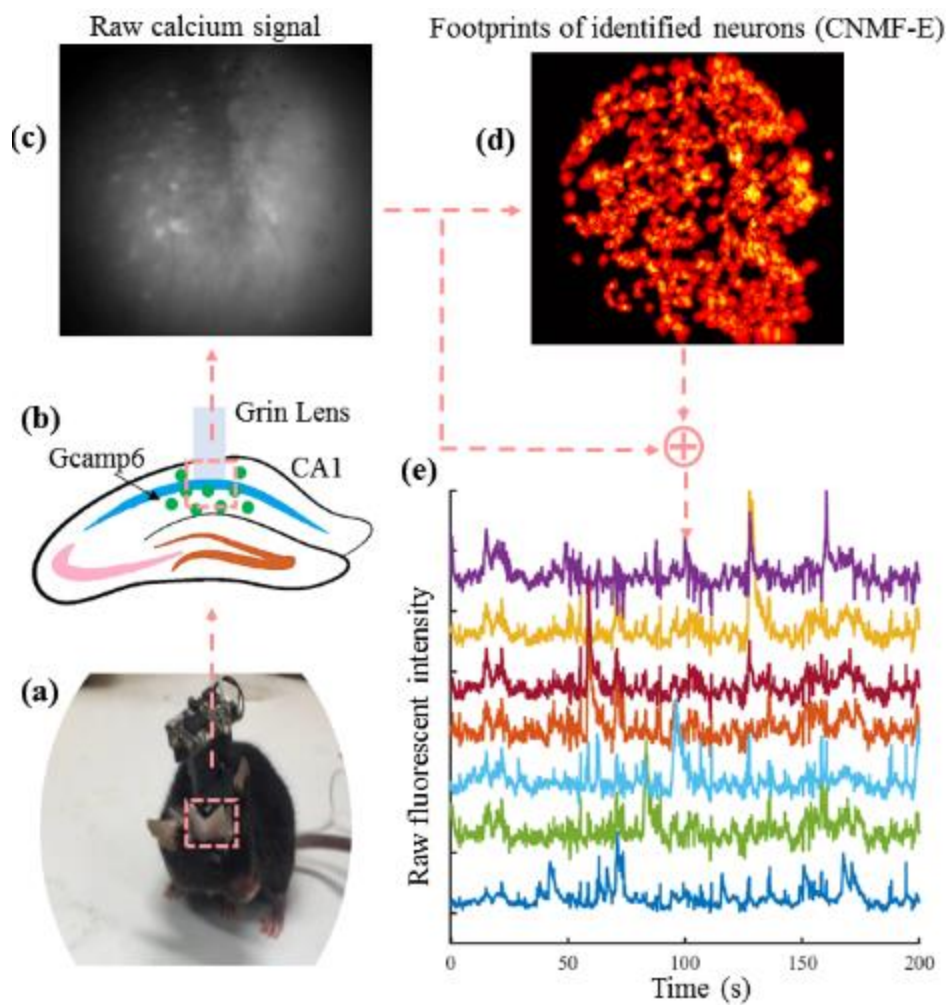

475

476 **Figure 1. In vivo calcium signal recording pipelines. (a)** An example of a mouse with a miniscope. **(b)**

477 Diagram of Grin lens implanted in hippocampal CA1. **(c)** An example of the raw calcium signal. **(d)** An

478 example of the spatial footprints of neurons identified with CNMF-E algorithm. **(e)** An example of the raw

479 fluorescent intensity of detected neurons.

480

481

482

483

484

485

486

487

488

489

490

491

492

493

494

495

496

497

498

499

500

501

502

503

504

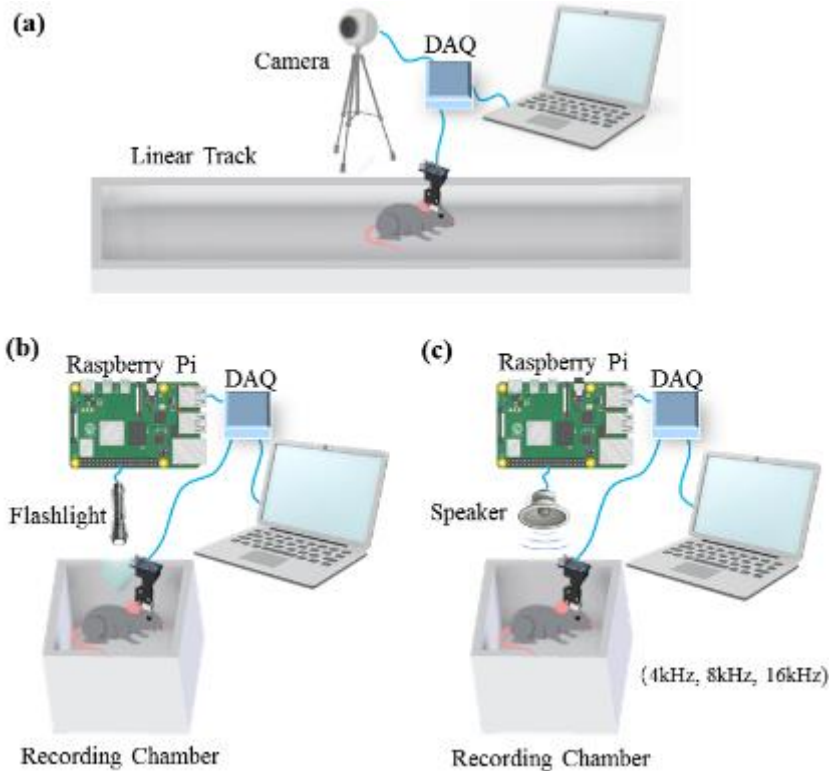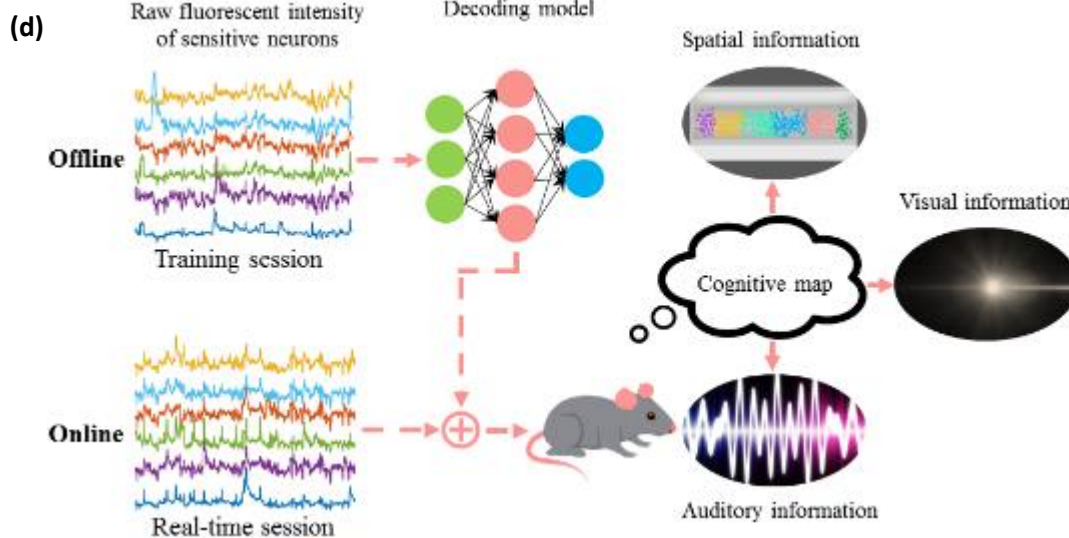

505

506

507

508

509

510

511

512

513

**Figure 2. Experimental apparatus.** The miniscope and data acquisition board (DAQ) were used to record the animal's hippocampal calcium activity during experiments. (a) The mouse traversed a 1.6m linear track and a camera was used to track the animal's location. (b-c) The animal was placed in a small recording chamber. The visual and auditory stimuli were controlled using a Raspberry Pi. (b) The flashlight was switched on and off alternately. (c) The speaker was activated and deactivated alternately, playing sinusoidal tones centred at 4kHz, 8kHz, or 16kHz randomly. (d) Hippocampal activity decoding pipelines. In the training session, the raw fluorescent intensity of sensitive neurons was used to construct the decoding model. This model was then deployed in the real-time session to decode the spatial, visual, and auditory information.

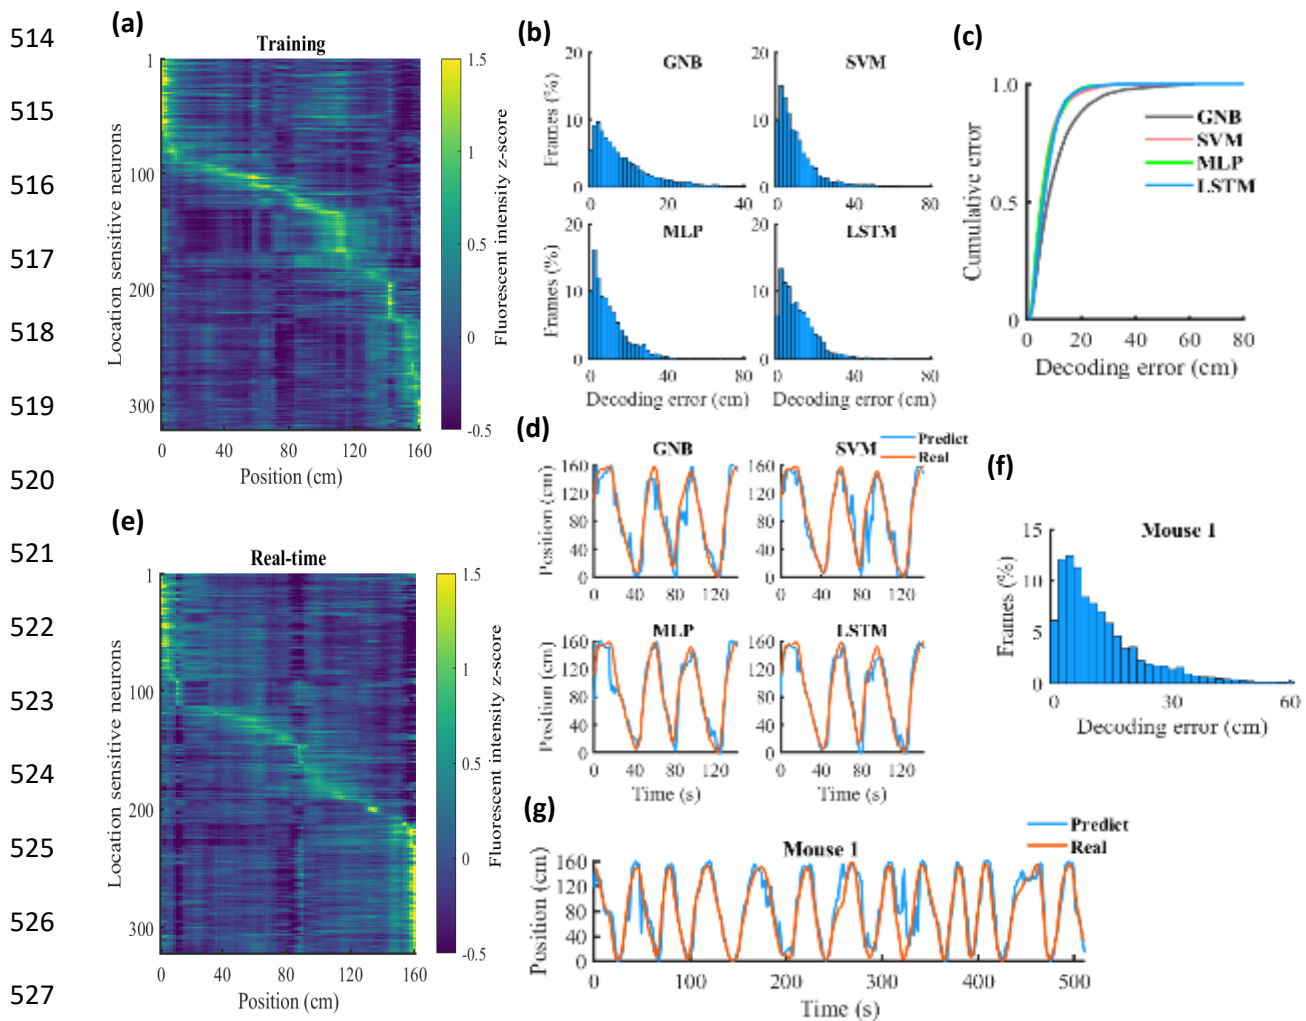

528 **Figure 3. Position reconstruction experiment.** (a) An example of the place field map of sensitive  
529 neurons in training sessions. The colour represents the fluorescent intensity z-score. (b) Decoding error  
530 histograms of five-fold cross-validation results in the training session using GNB, SVM, MLP, and  
531 LSTM decoders. (c) Cumulative fraction of the decoding error using different models. (One-way  
532 ANOVA,  $F(3,240)=45.02$ ,  $p<0.0001$ ; Bonferroni post-hoc test showed that decoding error using GNB  
533 was significantly higher than that using SVM, MLP, and LSTM,  $p<0.0001$ .) (d) Decoding performance  
534 using different models in the training session. The decoding model was constructed based on the first  
535 75% of the recorded data and checked on the remaining 25%. The red curve demonstrates the mouse's  
536 real position tracked by the video camera and the blue curve represents the reconstructed position. (e)  
537 The place field map of sensitive neurons in the real-time session. (f) The decoding error histogram in  
538 the real-time position reconstruction experiment. (g) An example of the mouse's running trajectory  
539 reconstruction in a real-time session.

540

541

542



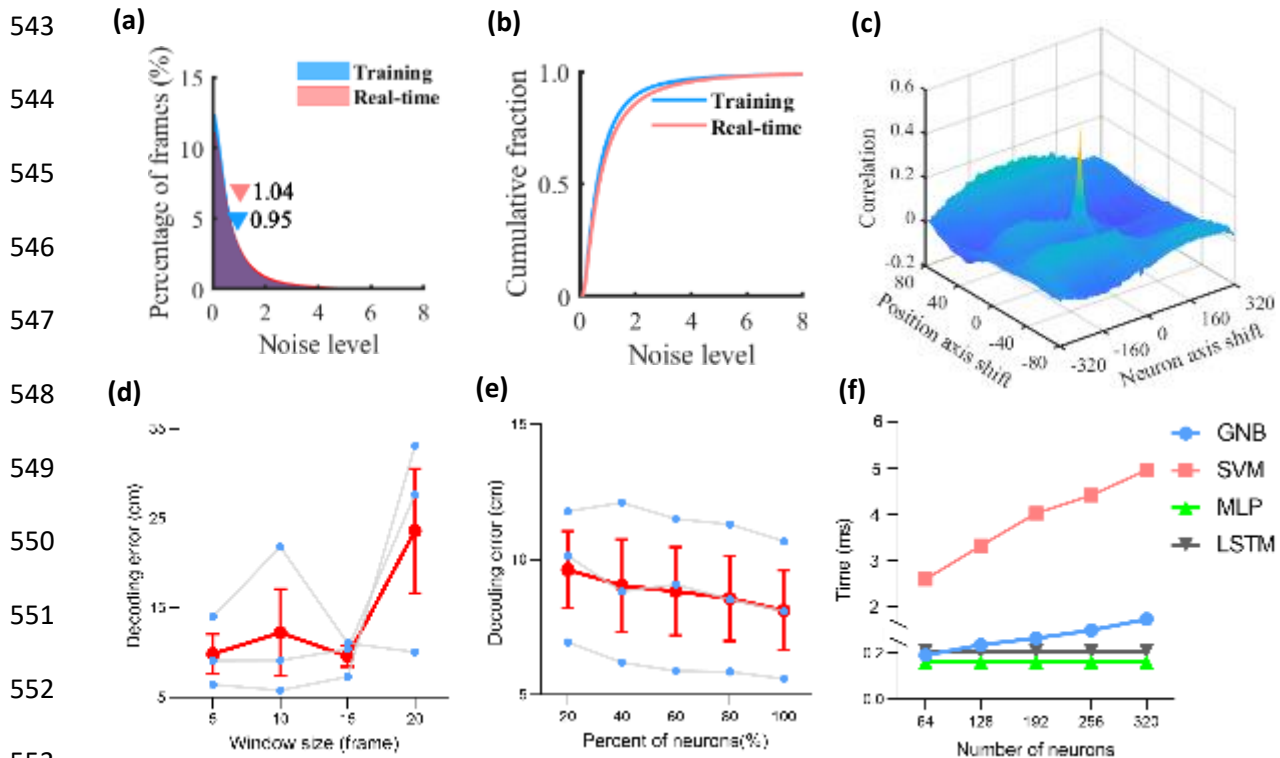

554 **Figure 4. Position reconstruction decoding models.** (a-b) Histogram and the cumulative fraction of  
555 the noise level in the training session and real-time session (paired Student's t-test didn't show  
556 significant differences:  $t=0.04121$ ,  $df=79$ ,  $p = 0.9672$ ). (c) Cross-correlation of place field maps  
557 between the training session and real-time session. (d) Position reconstruction error as a function of  
558 time window size using the LSTM model. Blue dots represent the decoding error measured on three  
559 mice, and the red dots represent the mean error (Pearson correlation,  $R^2= 0.5646$ ,  $p = 0.2486$ ). (e)  
560 Position reconstruction error as a function of percent of sampled neurons using the MLP model. Error  
561 decreased by incorporating more neurons (Pearson correlation,  $R^2= 0.9716$ ,  $p = 0.002$ ). (f) Processing  
562 time as a function of the number of sampled neurons in a mouse using different models (Pearson  
563 correlation, GNB:  $R^2= 0.9926$ ,  $p = 0.0003$ ; SVM:  $R^2= 0.9876$ ,  $p = 0.0006$ ; MLP:  $R^2= 0.7701$ ,  $p =$   
564  $0.0505$ ; LSTM:  $R^2= 0.5103$ ,  $p = 0.1752$ ).

565

566

567

568

569

570

571

572

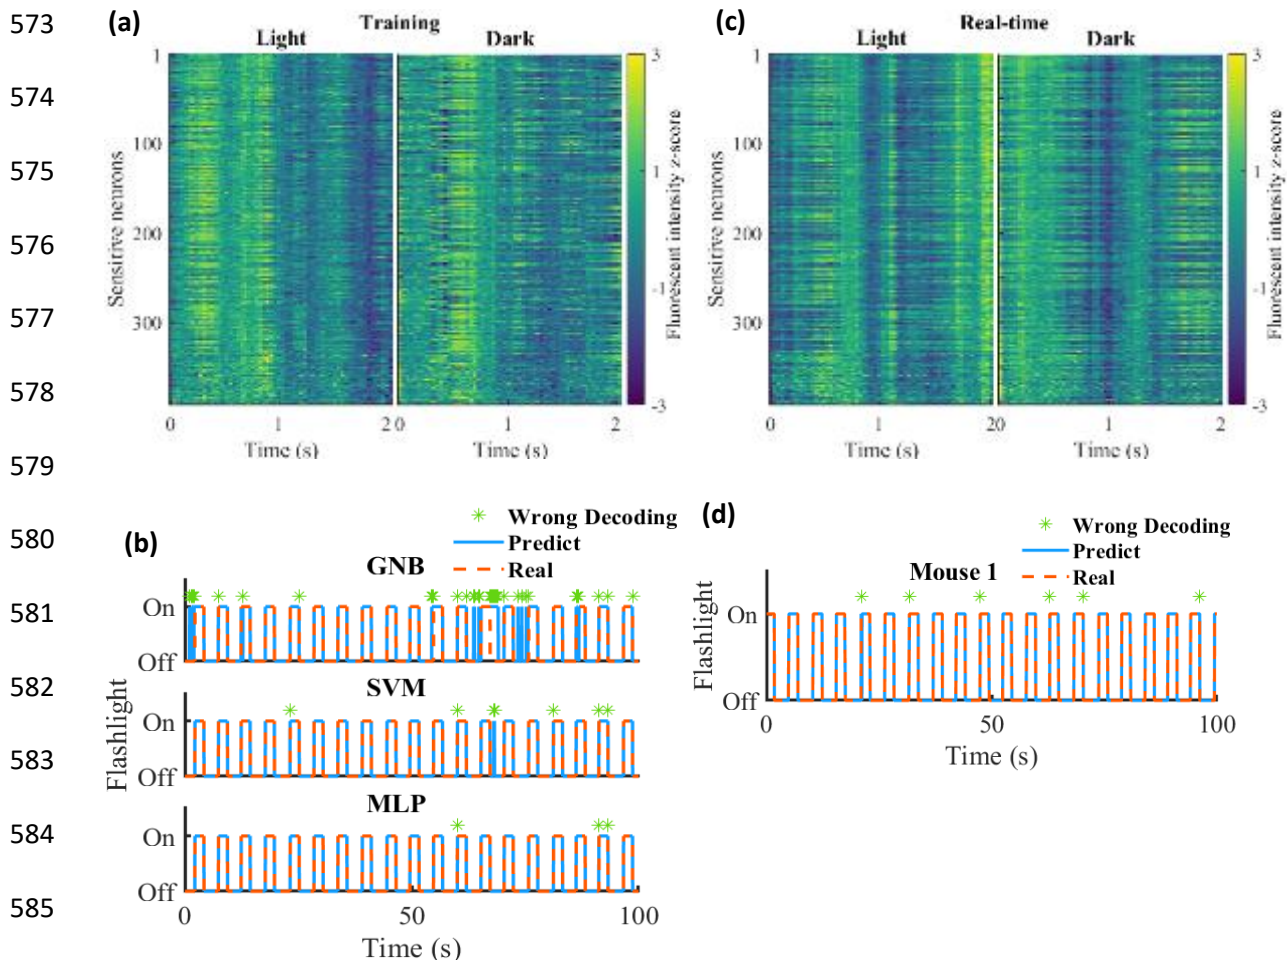

586

587 **Figure 5. Visual stimuli experiment.** (a) The visual stimuli evoked neuronal activity of sensitive  
588 neurons in light and dark epochs in the training session. The colour represents the fluorescent intensity  
589 z-score. The flashlight was turned on or off at time “0”. (b) An example of the decoding performance  
590 of different decoders in the training session (100\*30 frames). The decoding model was constructed  
591 based on the first 75% data and checked on the remaining 25% data. The red dashed line and solid blue  
592 line represent the real and predicted status of the flashlight respectively. The wrong decoding frame is  
593 marked with a green star. (c) The visual stimuli evoked neuronal activity of sensitive neurons in light  
594 and dark epochs in the real-time session. (d) An example of the decoding performance in the real-time  
595 session (100\*30 frames).

596

597

598

599

600

601

602

603

604

605

606

607

608

609

610

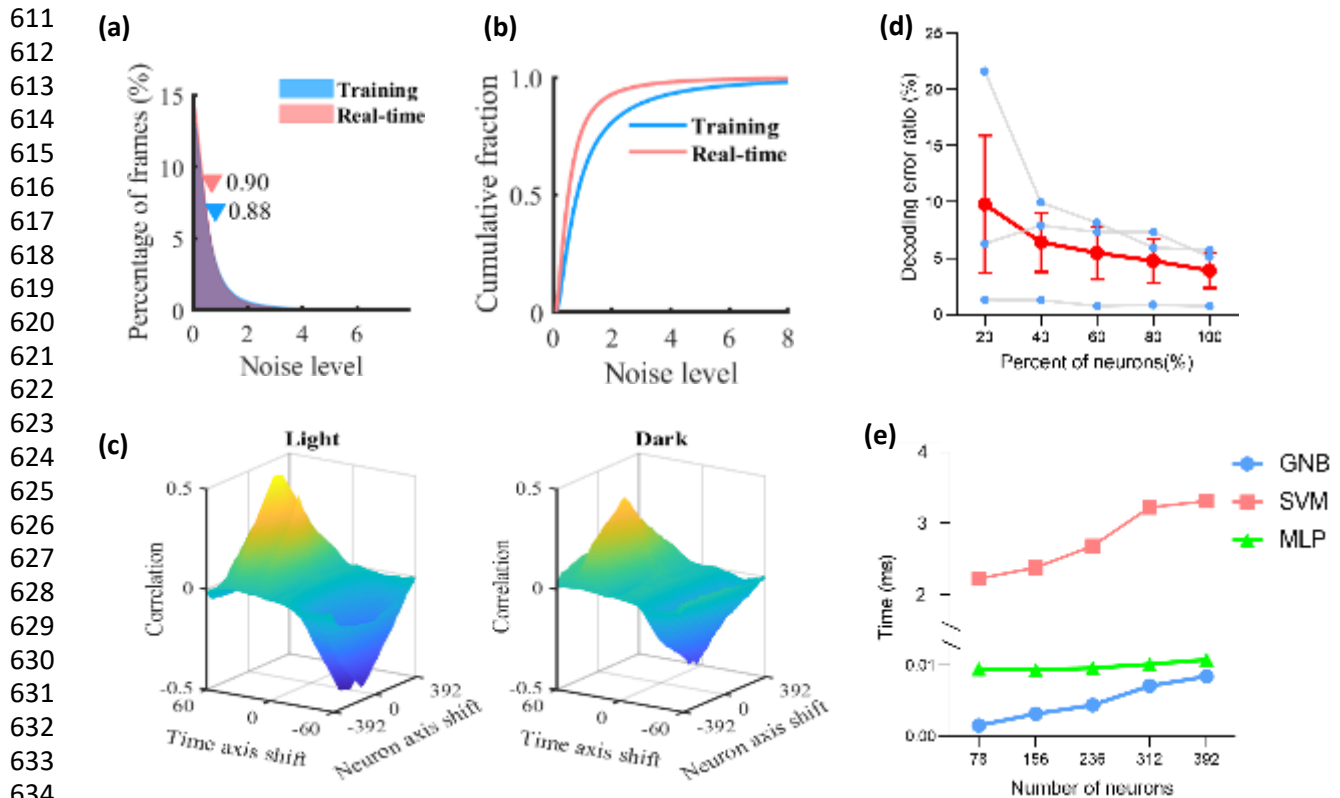

611  
612  
613  
614  
615  
616  
617  
618  
619  
620  
621  
622  
623  
624  
625  
626  
627  
628  
629  
630  
631  
632  
633  
634  
635  
636  
637 **Figure 6. Visual stimuli decoding models.** (a-b) Histogram and the cumulative fraction of the noise  
638 level in the training session and real-time session (paired Student's t-test did not show significant  
639 differences:  $t=0.1362$ ,  $df=79$ ,  $p = 0.8920$ ). (c) Cross-correlation of firing rate maps between the training  
640 session and real-time session in light and dark environments. (d) Decoding error as a function of percent  
641 of sampled neurons using the MLP model. Blue dots represent the decoding error measured on three  
642 mice, and the red dots represent the mean error. Error decreased considering more neurons (Pearson  
643 correlation,  $R^2 = 0.8702$ ,  $p = 0.0207$ ). (e) Processing time as a function of the number of sampled  
644 neurons in a mouse using different models (Pearson correlation, GNB:  $R^2 = 0.9853$ ,  $p = 0.0008$ ; SVM:  
645  $R^2 = 0.9523$ ,  $p = 0.0045$ ; MLP:  $R^2 = 0.8162$ ,  $p = 0.0355$ ).

646  
647  
648  
649  
650  
651  
652  
653  
654  
655  
656  
657  
658  
659  
660  
661  
662  
663

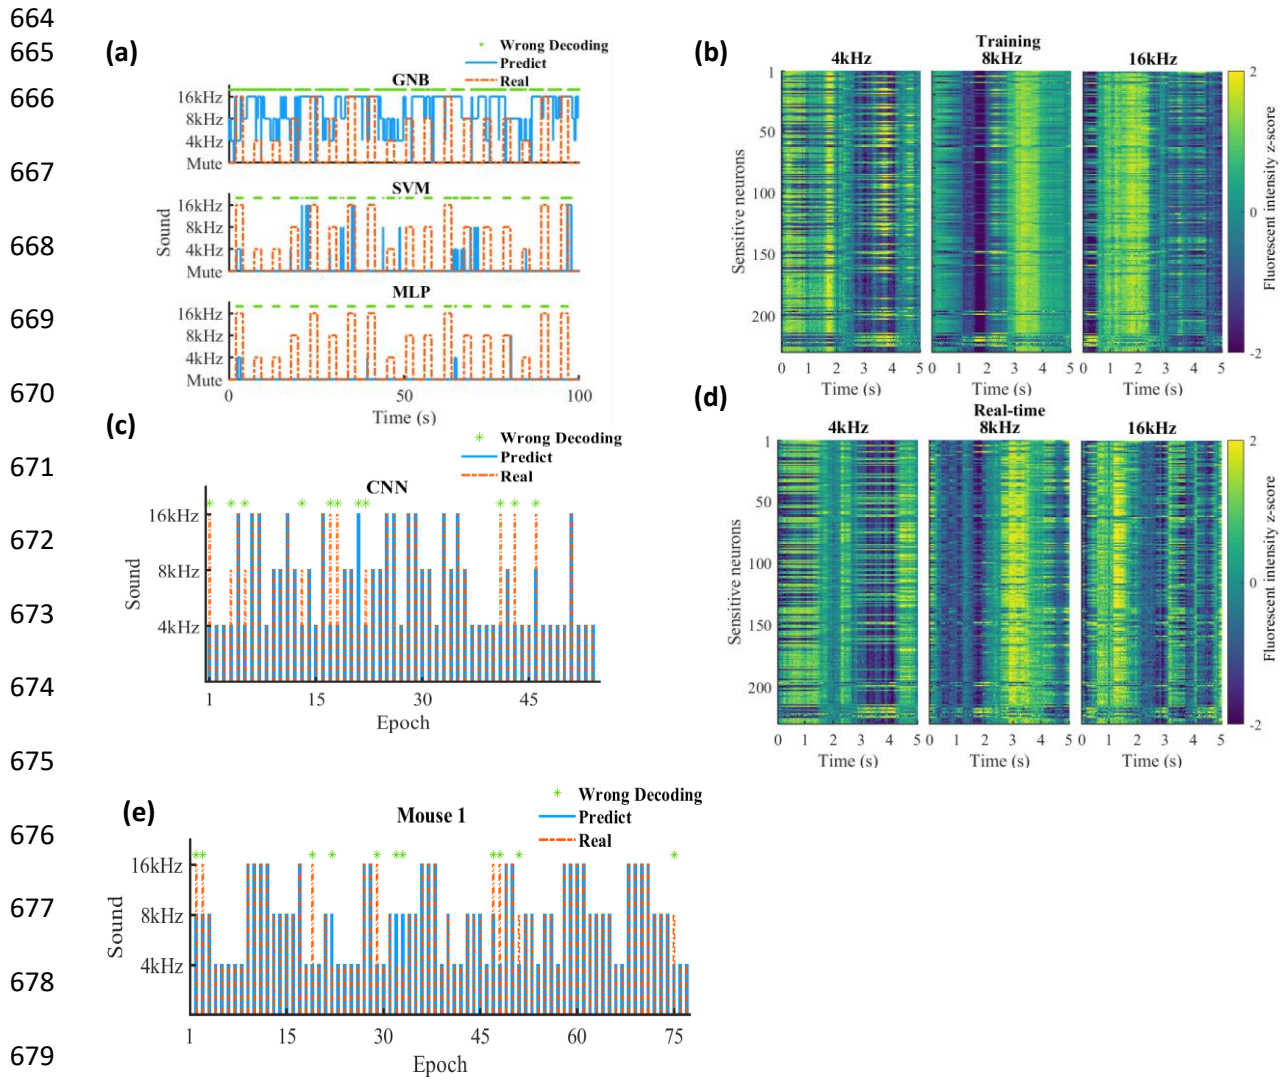

680

681 **Figure 7. Auditory stimuli experiment. The mice were exposed to sound stimuli at three different**  
682 **frequencies. (a)** An example of the decoding performance of different models in the training session  
683 (100\*30 frames). The decoding model was constructed based on the first 75% data and checked on the  
684 remaining 25% data. The red dashed line and solid blue line represent the real and predicted status of  
685 the auditory stimuli respectively. The wrong decoding frame is marked with a green star. All decoders  
686 failed to make accurate predictions. **(b)** The sound stimuli evoked neuronal activity of sensitive  
687 neurons in 4kHz, 8kHz, and 16kHz epochs during the training session. The colour represents the  
688 fluorescent intensity z-score. The speaker was turned on at time “0” and turned off at time “2”. **(c)** An  
689 example of the CNN decoding performance in the training session. The data was sectioned into 5-s  
690 time-length epochs according to the frequency of the stimuli. **(d)** The sound stimuli evoked neuronal  
691 activity of sensitive neurons in the real-time session. **(e)** An example of the decoding performance using  
692 a CNN model in the real-time session.

693

694

695

696

697

698

699

700

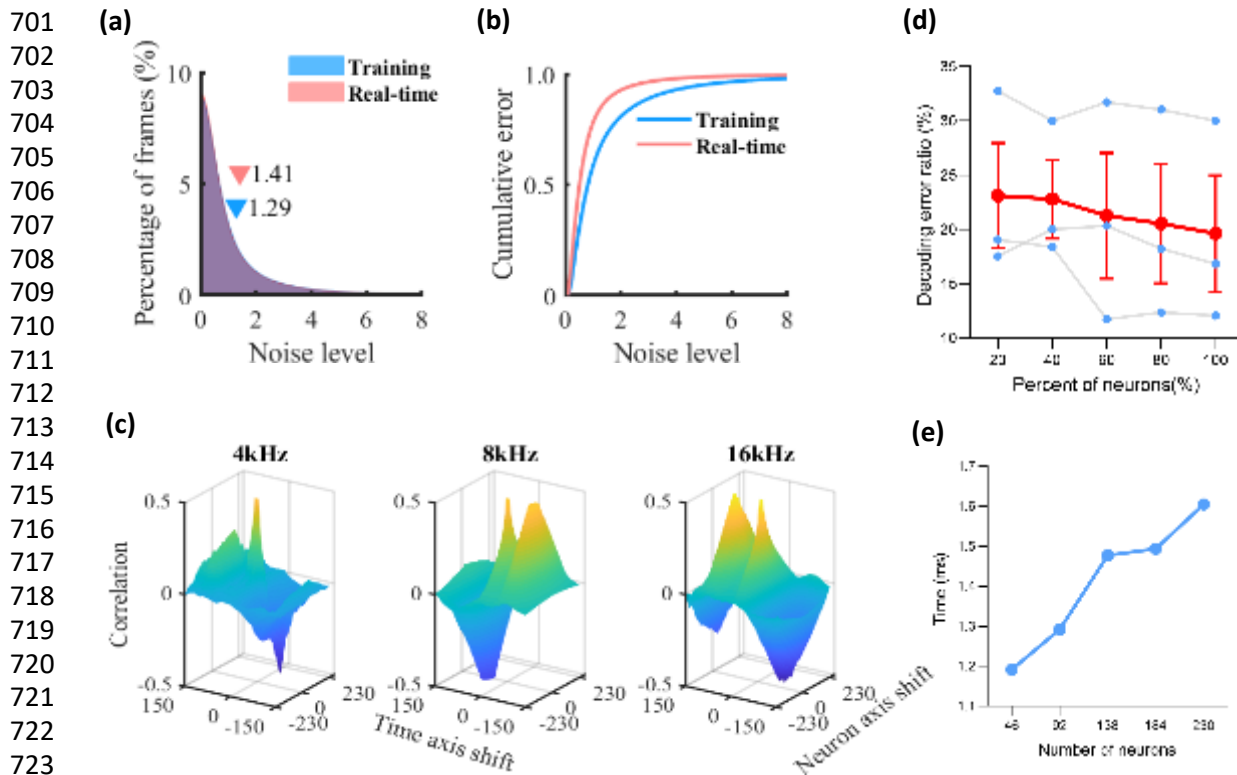

701  
702  
703  
704  
705  
706  
707  
708  
709  
710  
711  
712  
713  
714  
715  
716  
717  
718  
719  
720  
721  
722  
723  
724  
725 **Figure 8. Auditory stimuli decoding models.** (a-b) Histogram and the cumulative fraction of the noise  
726 level in the training session and real-time session (paired Student's t-test did not show significant  
727 differences:  $t=1.226$ ,  $df=79$ ,  $p = 0.2238$ ). (c) Cross-correlation of firing rate maps between the training  
728 session and real-time session in three environments. (d) Decoding error as a function of percent of  
729 sampled neurons using the CNN model. Blue dots represent the decoding error measured on three mice,  
730 and the red dots represent the mean error. Error decreased considering more neurons (Pearson  
731 correlation,  $R^2=0.9717$ ,  $p = 0.002$ ). (e) Processing time as a function of the number of sampled neurons  
732 in a mouse using the CNN model (Pearson correlation, GNB:  $R^2=0.9518$ ,  $p = 0.0046$ ).

733  
734  
735  
736  
737  
738  
739  
740  
741  
742  
743  
744  
745  
746  
747  
748  
749  
750  
751  
752  
753

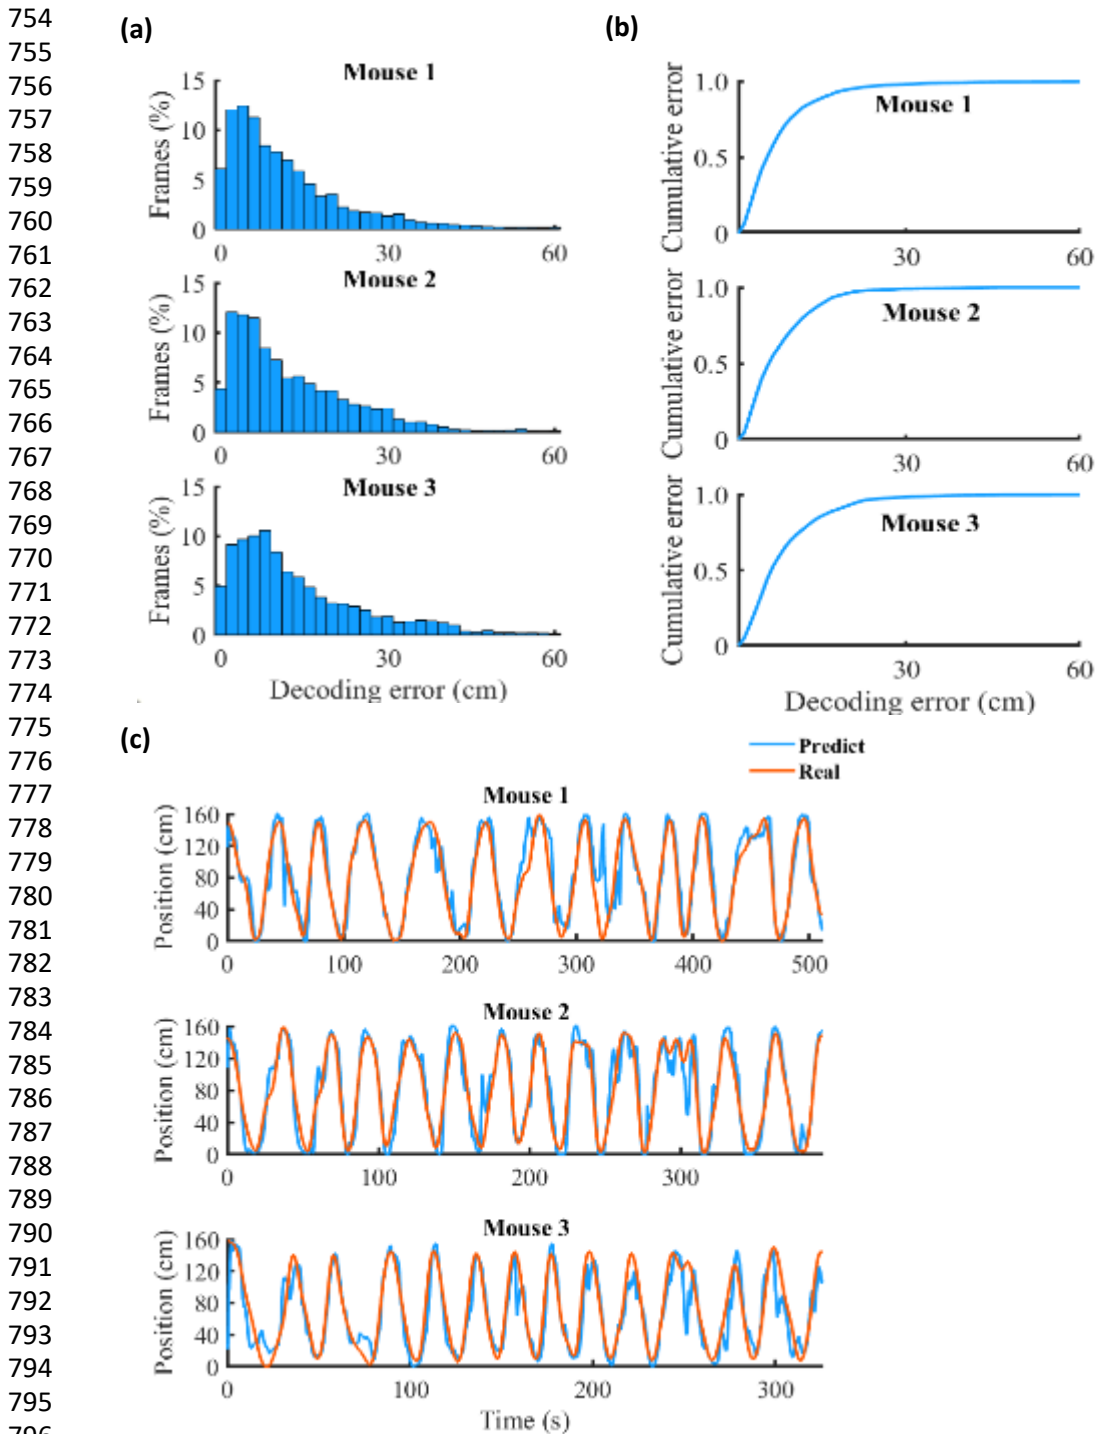

797 **Supplementary Figure 1. Position reconstruction experiment. (a-b)** Histogram and the cumulative  
798 fraction of the decoding error in the real-time session. The decoding model with the best performance  
799 in the training session was implemented in each mouse respectively. (c) Mice's running trajectory  
800 reconstruction in the real-time session. The red curve demonstrates the mouse's real position tracked  
801 by the video camera and the blue curve represents the reconstructed position.

802  
803  
804

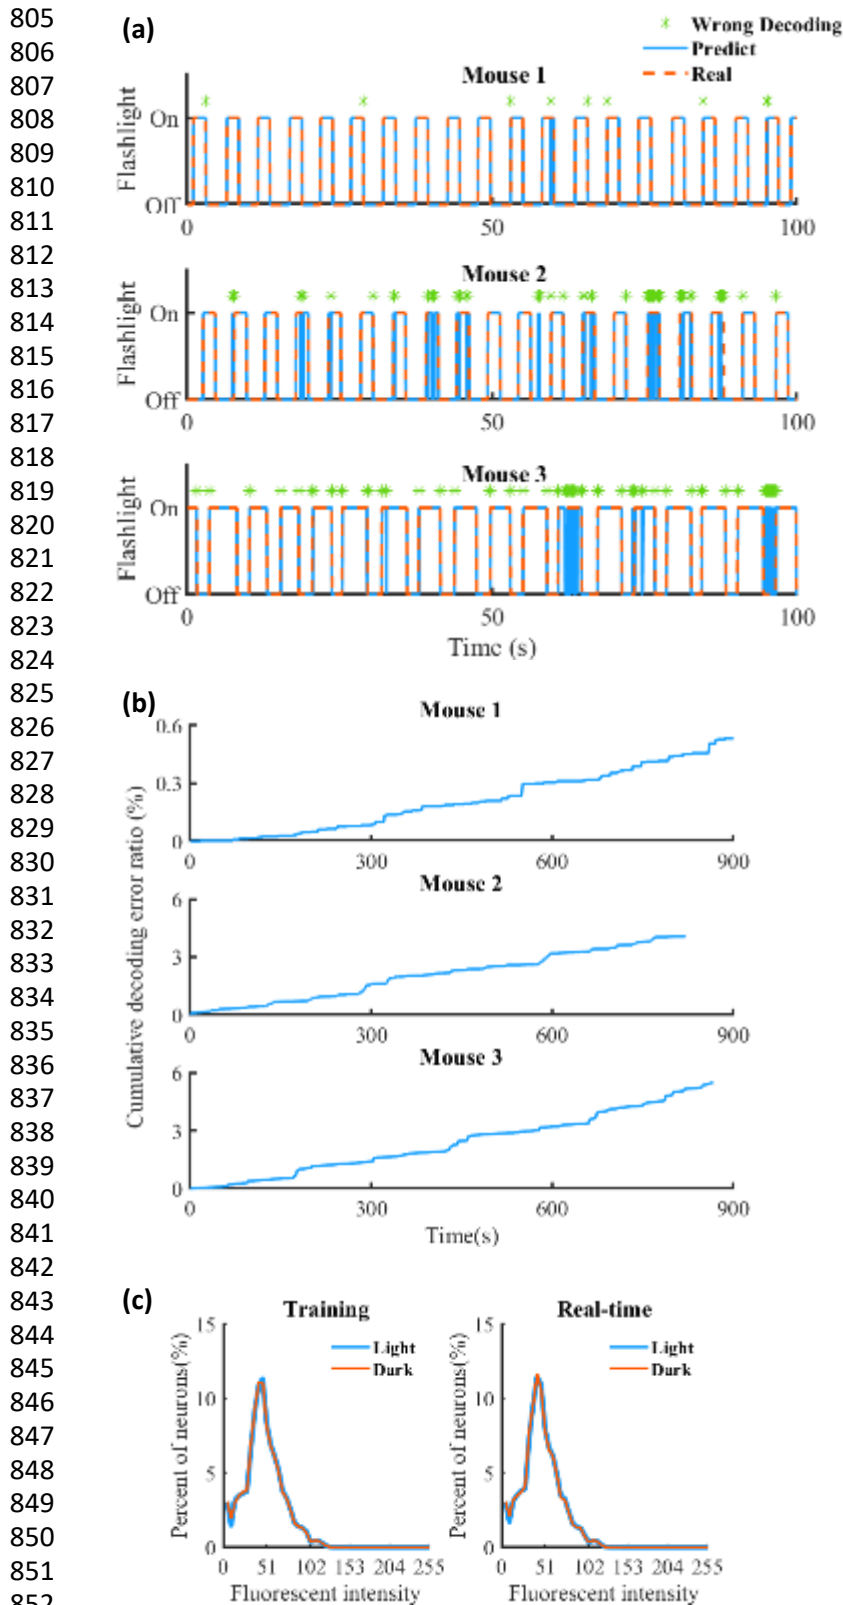

853 **Supplementary Figure 2. Visual stimuli identification experiment.** (a) Examples of the decoding  
854 performance in the real-time session (100\*30 frames). The decoder with the best performance in the  
855 training session was used in each mouse respectively. The red dashed line and solid blue line represent  
856 the real and predicted status of the auditory stimuli respectively. The wrong decoding frame is marked  
857 with a green star. (b) Cumulative decoding error ratio with respect to time. (c) Distributions of neurons'  
858 fluorescent intensity. Paired Student's t-test didn't show significant differences (Training:  $t =$   
859  $4.403 \times 10^{-14}$ ,  $df=51$ ,  $p > 0.9999$ ; Real-time:  $t=9.703 \times 10^{-14}$ ,  $df=51$ ,  $p > 0.9999$ ).

860  
861  
862  
863  
864  
865  
866  
867  
868  
869  
870  
871  
872  
873  
874  
875  
876  
877  
878  
879  
880  
881  
882  
883  
884  
885  
886  
887  
888  
889  
890  
891  
892  
893  
894  
895  
896  
897  
898  
899  
900  
901  
902  
903  
904  
905  
906  
907  
908  
909  
910  
911  
912  
913  
914

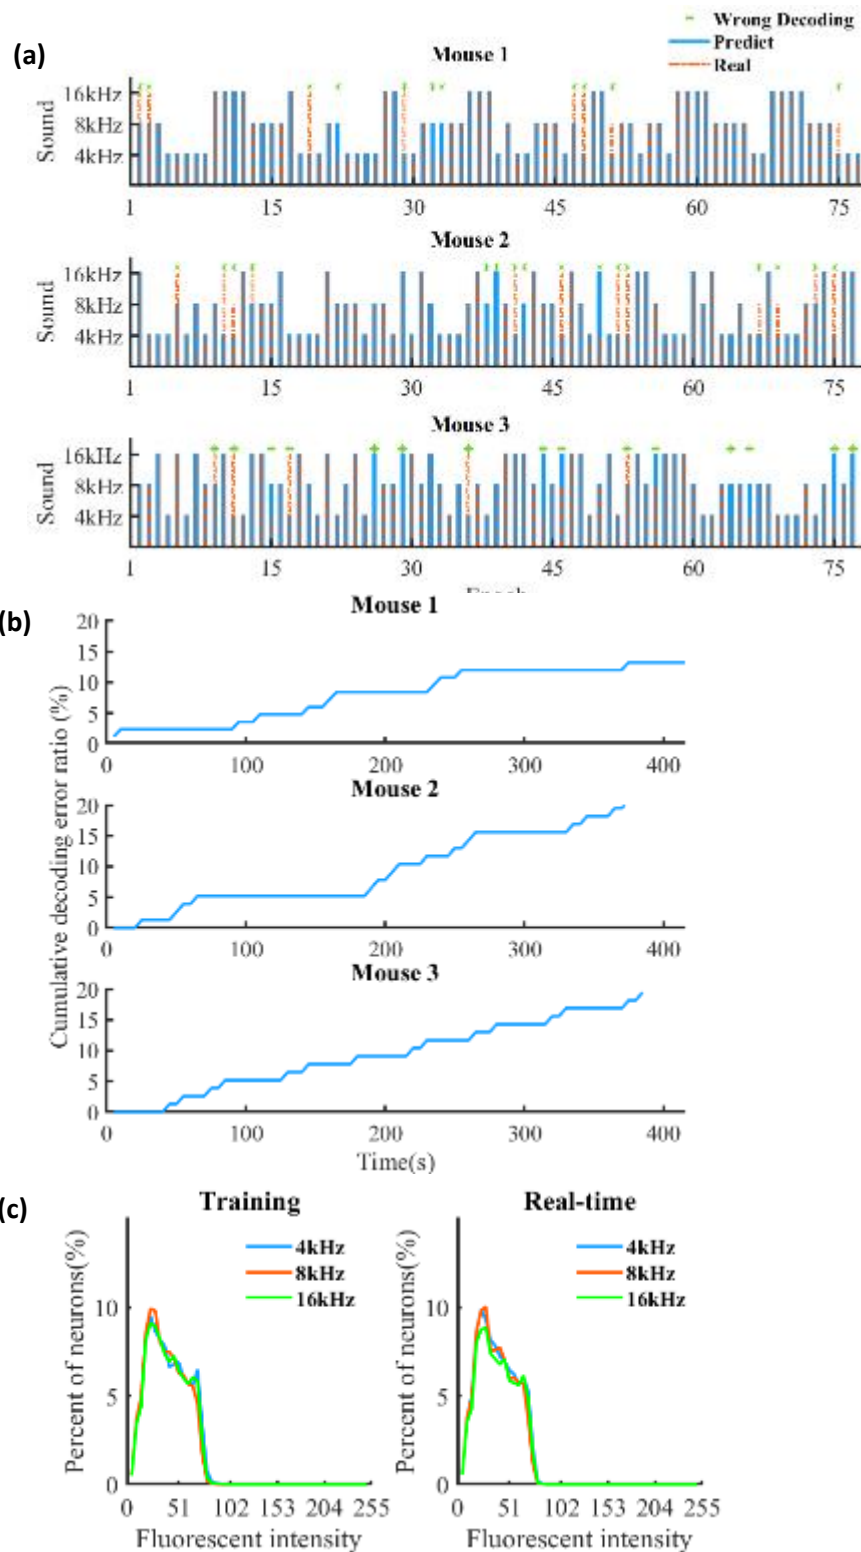

**Supplementary Figure 3. Auditory stimuli identification experiment.** (a) Examples of the decoding performance using a CNN model in the real-time session. The red dashed line and solid blue line represent the real and predicted status of the auditory stimuli respectively. The wrong decoding frame is marked with a green star. (b) Cumulative decoding error ratio with respect to time. (c) Distributions of neuronal fluorescent intensity. One-way ANOVA didn't show significant differences (Training:  $F(2,102)=0.4342$ ,  $p=0.6490$ ; Real-time:  $F(2,102)=2.853$ ,  $p=0.0623$ ).



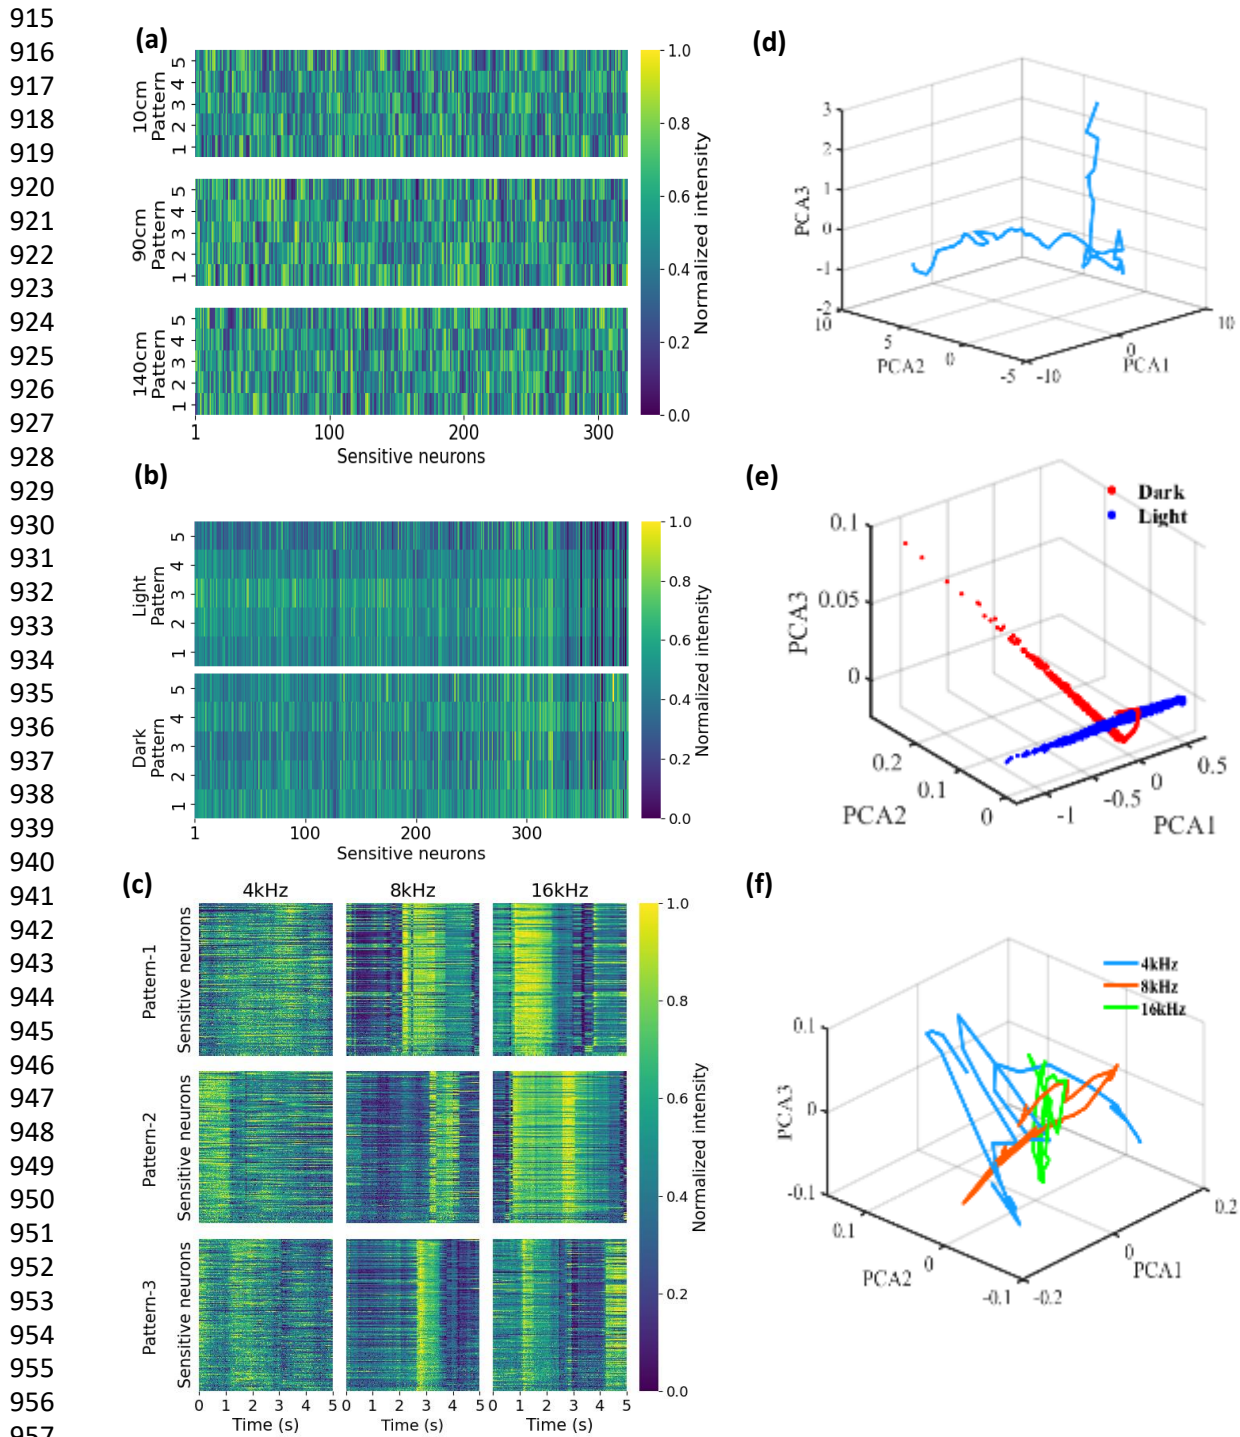

**Supplementary Figure 4. Neuronal ensemble firing patterns.** Some examples of sensitive neurons' firing patterns in (a) linear track experiments, (b) visual stimuli experiments, and (c) auditory stimuli experiments. (d-f) show the animal's running trajectory, visual stimuli responses, and auditory stimuli responses described in a high-dimensional neural state space. Features were extracted from the output of the last hidden layer in a MLP model (d-e) or a CNN model (f). Principle component analysis (PCA) were applied on the features for better visualization.

964  
965  
966  
967  
968

| <b>Decoder</b> / mean<br>median | <b>Mouse_1</b> | <b>Mouse_2</b> | <b>Mouse_3</b> | <b>All</b> (cm/frame)        |
|---------------------------------|----------------|----------------|----------------|------------------------------|
| <b>GNB</b>                      | 17.76<br>12    | 20.00<br>14    | 30.60<br>22    | 22.79 ± 3.42<br>16.00 ± 2.64 |
| <b>SVM</b>                      | 10.45<br>8     | 16.42<br>12    | 13.06<br>10    | 13.31 ± 1.49<br>10.00 ± 1.00 |
| <b>MLP</b>                      | 10.29<br>8     | 16.24<br>12    | 16.98<br>14    | 14.50 ± 1.83<br>11.33 ± 1.52 |
| <b>LSTM</b>                     | 11.16<br>10    | 17.13<br>12    | 16.44<br>14    | 14.91 ± 1.63<br>12.00 ± 1.00 |

969 **Supplementary Table 1.** The mean and median decoding error (cm/frame) in the training session of  
 970 the position reconstruction experiment. The first row in each cell represents the mean error and the  
 971 second row represents the median error. The overall error is expressed as mean/median ± standard  
 972 error mean (SEM).

973

| <b>Decoder</b> | <b>Mouse_1</b> | <b>Mouse_2</b> | <b>Mouse_3</b> | <b>All</b>     |
|----------------|----------------|----------------|----------------|----------------|
| <b>GNB</b>     | 22.95%         | 34.28%         | 4.40%          | 20.54% ± 8.70% |
| <b>SVM</b>     | 3.99%          | 4.01%          | 1.22%          | 3.08% ± 0.92%  |
| <b>MLP</b>     | 5.36%          | 4.63%          | 0.73%          | 3.57% ± 1.43%  |

974 **Supplementary Table 2.** The average decoding error ratio in the training session of the light stimuli  
 975 experiment. The overall error ratio is expressed as mean ± SEM.

976

| <b>Decoder</b> | <b>Mouse_1</b> | <b>Mouse_2</b> | <b>Mouse_3</b> | <b>All</b>     |
|----------------|----------------|----------------|----------------|----------------|
| <b>GNB</b>     | 71.09%         | 77.50%         | 81.34%         | 76.64% ± 2.59% |
| <b>SVM</b>     | 42.81%         | 39.85%         | 40.05%         | 40.91% ± 0.82% |
| <b>MLP</b>     | 39.33%         | 37.16%         | 37.84%         | 38.11% ± 0.55% |
| <b>CNN</b>     | 17.67%         | 22.76%         | 22.89%         | 21.11% ± 1.48% |

977 **Supplementary Table 3.** The average decoding error ratio in the training session of the sound stimuli  
 978 experiment. The overall error ratio is expressed as mean ± SEM.

979

980

## 981 Reference

- 982 Cai, D.J., Aharoni, D., Shuman, T., Shobe, J., Biane, J., Song, W., Wei, B., Veshkini, M., La-Vu, M., Lou, J. and  
983 Flores, S.E., 2016. A shared neural ensemble links distinct contextual memories encoded close in  
984 time. *Nature*, 534(7605), pp.115-118.
- 985  
986 Sun, D., Unnithan, R.R. and French, C., 2021. Scopolamine Impairs Spatial Information Recorded With  
987 “Miniscope” Calcium Imaging in Hippocampal Place Cells. *Frontiers in Neuroscience*, 15.
- 988  
989 Guizar-Sicairos, M., Thurman, S.T. and Fienup, J.R., 2008. Efficient subpixel image registration  
990 algorithms. *Optics letters*, 33(2), pp.156-158.
- 991  
992 Zhou, P., Resendez, S.L., Rodriguez-Romaguera, J., Jimenez, J.C., Neufeld, S.Q., Giovannucci, A., et al. (2018).  
993 Efficient and accurate extraction of in vivo calcium signals from microendoscopic video data. *Elife* 7.  
994 doi: 10.7554/eLife.28728.
- 995  
996 Ravassard, P., Kees, A., Willers, B., Ho, D., Aharoni, D.A., Cushman, J., et al. (2013). Multisensory control of  
997 hippocampal spatiotemporal selectivity. *Science* 340, 1342-1346. doi: 10.1126/science.1232655.
- 998  
999 Rubin, A., Geva, N., Sheintuch, L., and Ziv, Y. (2015). Hippocampal ensemble dynamics timestamp events in  
1000 long-term memory. *eLife* 4:e12247. doi: 10.7554/eLife.12247
- 1001  
1002 Hu, S., Ciliberti, D., Grosmark, A.D., Michon, F., Ji, D., Penagos, H., Buzsáki, G., Wilson, M.A., Kloosterman,  
1003 F. and Chen, Z., 2018. Real-time readout of large-scale unsorted neural ensemble place codes. *Cell reports*, 25(10),  
1004 pp.2635-2642.
- 1005  
1006 Ciliberti, D., Michon, F. and Kloosterman, F., 2018. Real-time classification of experience-related ensemble  
1007 spiking patterns for closed-loop applications. *Elife*, 7, p.e36275.
- 1008  
1009 Ghosh, K.K., Burns, L.D., Cocker, E.D., Nimmerjahn, A., Ziv, Y., El Gamal, A. and Schnitzer, M.J., 2011.  
1010 Miniaturized integration of a fluorescence microscope. *Nature methods*, 8(10), p.871.
- 1011  
1012 Rubin, A., Geva, N., Sheintuch, L. and Ziv, Y., 2015. Hippocampal ensemble dynamics timestamp events in long-  
1013 term memory. *Elife*, 4, p.e12247.
- 1014  
1015 Alzahab, N.A., Apollonio, L., Di Iorio, A., Alshalak, M., Iarlori, S., Ferracuti, F., Monteriù, A. and Porcaro, C.,  
1016 2021. Hybrid Deep Learning (hDL)-Based Brain-Computer Interface (BCI) Systems: A Systematic  
1017 Review. *Brain Sciences*, 11(1), p.75.
- 1018  
1019 McFarland, D.J. and Wolpaw, J.R., 2011. Brain-computer interfaces for communication and  
1020 control. *Communications of the ACM*, 54(5), pp.60-66.
- 1021  
1022 Schalk, G., McFarland, D.J., Hinterberger, T., Birbaumer, N. and Wolpaw, J.R., 2004. BCI2000: a general-  
1023 purpose brain-computer interface (BCI) system. *IEEE Transactions on biomedical engineering*, 51(6), pp.1034-  
1024 1043.
- 1025  
1026 Wolpaw, J.R., Birbaumer, N., Heetderks, W.J., McFarland, D.J., Peckham, P.H., Schalk, G., Donchin, E.,  
1027 Quatrano, L.A., Robinson, C.J. and Vaughan, T.M., 2000. Brain-computer interface technology: a review of the  
1028 first international meeting. *IEEE transactions on rehabilitation engineering*, 8(2), pp.164-173.
- 1029  
1030 Morgane, P.J., Galler, J.R. and Mokler, D.J., 2005. A review of systems and networks of the limbic  
1031 forebrain/limbic midbrain. *Progress in neurobiology*, 75(2), pp.143-160.
- 1032  
1033 Olton, D.S., Becker, J.T. and Handelmann, G.E., 1979. Hippocampus, space, and memory. *Behavioral and Brain*  
1034 *sciences*, 2(3), pp.313-322.
- 1035

- 1036 Ho, A.S., Hori, E., Thi Nguyen, P.H., Urakawa, S., Kondoh, T., Torii, K., Ono, T. and Nishijo, H., 2011.  
1037 Hippocampal neuronal responses during signaled licking of gustatory stimuli in different  
1038 contexts. *Hippocampus*, 21(5), pp.502-519.
- 1039  
1040 Ramadan, R.A. and Vasilakos, A.V., 2017. Brain computer interface: control signals  
1041 review. *Neurocomputing*, 223, pp.26-44.
- 1042  
1043 Blankertz, B., Muller, K.R., Krusienski, D.J., Schalk, G., Wolpaw, J.R., Schlogl, A., Pfurtscheller, G., Millan,  
1044 J.R., Schroder, M. and Birbaumer, N., 2006. The BCI competition III: Validating alternative approaches to actual  
1045 BCI problems. *IEEE transactions on neural systems and rehabilitation engineering*, 14(2), pp.153-159.
- 1046  
1047 Tangermann, M., Müller, K.R., Aertsen, A., Birbaumer, N., Braun, C., Brunner, C., Leeb, R., Mehring, C., Miller,  
1048 K.J., Mueller-Putz, G. and Nolte, G., 2012. Review of the BCI competition IV. *Frontiers in neuroscience*, 6, p.55.
- 1049  
1050 Nguyen, T.K.T., Navratilova, Z., Cabral, H., Wang, L., Gielen, G., Battaglia, F.P. and Bartic, C., 2014. Closed-  
1051 loop optical neural stimulation based on a 32-channel low-noise recording system with online spike  
1052 sorting. *Journal of neural engineering*, 11(4), p.046005.
- 1053  
1054 Guger, C., Gener, T., Pennartz, C., Brotons-Mas, J., Edlinger, G., Badia, B.I., Schaffelhofer, S., Verschure, P. and  
1055 Sanchez-Vives, M.V., 2011. Real-time position reconstruction with hippocampal place cells. *Frontiers in*  
1056 *neuroscience*, 5, p.85.
- 1057  
1058 Eichenbaum, H., 2015. The hippocampus as a cognitive map... of social space. *Neuron*, 87(1), pp.9-11.
- 1059  
1060 O'keefe, J., and Dostrovsky, J. (1971). The hippocampus as a spatial map. Preliminary evidence from unit activity  
1061 in the freely-moving rat. *Brain Res* 34, 171-175. doi: 10.1016/0006-8993(71)90358-1.
- 1062  
1063 O'keefe, J. and Nadel, L., 1978. *The hippocampus as a cognitive map*. Oxford: Clarendon Press.
- 1064  
1065 Nakazawa, K., McHugh, T.J., Wilson, M.A. and Tonegawa, S., 2004. NMDA receptors, place cells and  
1066 hippocampal spatial memory. *Nature Reviews Neuroscience*, 5(5), pp.361-372.
- 1067  
1068 Best, P.J., White, A.M. and Minai, A., 2001. Spatial processing in the brain: the activity of hippocampal place  
1069 cells. *Annual review of neuroscience*, 24(1), pp.459-486.
- 1070  
1071 Moser, E.I., Kropff, E. and Moser, M.B., 2008. Place cells, grid cells, and the brain's spatial representation  
1072 system. *Annu. Rev. Neurosci.*, 31, pp.69-89.
- 1073  
1074 Liu, Y.Z., Wang, Y., Tang, W., Zhu, J.Y. and Wang, Z., 2018. NMDA receptor-gated visual responses in  
1075 hippocampal CA1 neurons. *The Journal of physiology*, 596(10), pp.1965-1979.
- 1076  
1077 Acharya, L., Aghajan, Z.M., Vuong, C., Moore, J.J. and Mehta, M.R., 2016. Causal influence of visual cues on  
1078 hippocampal directional selectivity. *Cell*, 164(1-2), pp.197-207.
- 1079  
1080 Itskov, P.M., Vinnik, E., Honey, C., Schnupp, J. and Diamond, M.E., 2012. Sound sensitivity of neurons in rat  
1081 hippocampus during performance of a sound-guided task. *Journal of neurophysiology*, 107(7), pp.1822-1834.
- 1082  
1083 Berger, T. W., Alger, B., and Thompson, R. F. (1976). Neuronal substrate of classical conditioning in the  
1084 hippocampus. *Science* 192, 483-485.
- 1085  
1086 Moita, M. A., Rosis, S., Zhou, Y., Ledoux, J. E., and Blair, H. T. (2003). Hippocampal place cells acquire location-  
1087 specific responses to the conditioned stimulus during auditory fear conditioning. *Neuron* 37, 485-497.
- 1088  
1089 Komorowski, R. W., Manns, J. R., and Eichenbaum, H. (2009). Robust conjunctive item-place coding by  
1090 hippocampal neurons parallels learning what happens where. *J. Neurosci.* 29, 9918-9929.
- 1091  
1092 Wood, E. R., Dudchenko, P. A., and Eichenbaum, H. (1999). The global record of memory in hippocampal  
1093 neuronal activity. *Nature* 397, 613-616.
- 1094  
1095 Taxidis, J., Pnevmatikakis, E.A., Dorian, C.C., Mylavarapu, A.L., Arora, J.S., Samadian, K.D., Hoffberg, E.A.  
and Golshani, P., 2020. Differential Emergence and Stability of Sensory and Temporal Representations in  
Context-Specific Hippocampal Sequences. *Neuron*, 108(5), pp.984-998.

- 1096 Pereira, A., Ribeiro, S., Wiest, M., Moore, L.C., Pantoja, J., Lin, S.C. and Nicolelis, M.A., 2007. Processing of  
1097 tactile information by the hippocampus. *Proceedings of the National Academy of Sciences*, 104(46), pp.18286-  
1098 18291.
- 1099
- 1100 Gener, T., Perez-Mendez, L. and Sanchez-Vives, M.V., 2013. Tactile modulation of hippocampal place  
1101 fields. *Hippocampus*, 23(12), pp.1453-1462.
- 1102
- 1103 Sodkomkham, D., Ciliberti, D., Wilson, M.A., Fukui, K.I., Moriyama, K., Numao, M. and Kloosterman, F., 2016.  
1104 Kernel density compression for real-time Bayesian encoding/decoding of unsorted hippocampal  
1105 spikes. *Knowledge-Based Systems*, 94, pp.1-12.
- 1106
- 1107 Deng, X., Liu, D.F., Kay, K., Frank, L.M. and Eden, U.T., 2015. Clusterless decoding of position from multiunit  
1108 activity using a marked point process filter. *Neural computation*, 27(7), pp.1438-1460.
- 1109 Patel, Y.A., George, A., Dorval, A.D., White, J.A., Christini, D.J. and Butera, R.J., 2017. Hard real-time closed-  
1110 loop electrophysiology with the Real-Time eXperiment Interface (RTXI). *PLoS computational biology*, 13(5),  
1111 p.e1005430.
- 1112
- 1113 Ranganath, C. and Ritchey, M., 2012. Two cortical systems for memory-guided behaviour. *Nature reviews*  
1114 *neuroscience*, 13(10), pp.713-726.
- 1115
- 1116 Lavenex, P. and Amaral, D.G., 2000. Hippocampal-neocortical interaction: A hierarchy of  
1117 associativity. *Hippocampus*, 10(4), pp.420-430.
- 1118
- 1119 Haggerty, D.C. and Ji, D., 2015. Activities of visual cortical and hippocampal neurons co-fluctuate in freely  
1120 moving rats during spatial behavior. *Elife*, 4, p.e08902.
- 1121
- 1122 Munoz-Lopez, M., MohedanoMorianio, A. and Insausti, R., 2010. Anatomical pathways for auditory memory in  
1123 primates. *Frontiers in neuroanatomy*, 4, p.129.
- 1124
- 1125 Webster, D.B. and Fay, R.R. eds., 2013. *The mammalian auditory pathway: neuroanatomy* (Vol. 1). Springer  
1126 Science & Business Media.
- 1127
- 1128 Xiao, C., Liu, Y., Xu, J., Gan, X. and Xiao, Z., 2018. Septal and hippocampal neurons contribute to auditory relay  
1129 and fear conditioning. *Frontiers in cellular neuroscience*, 12, p.102.
- 1130
- 1131 MacDonald CJ, Lepage KQ, Eden UT & Eichenbaum H (2011).Hippocampal “time cells” bridge the gap in  
1132 memory for discontinuous events. *Neuron* 71, 737–749.
- 1133
- 1134 Laskov, P., Gehl, C., Krüger, S., Müller, K.R., Bennett, K.P. and Parrado-Hernández, E., 2006. Incremental  
1135 support vector learning: Analysis, implementation and applications. *Journal of machine learning research*, 7(9).
- 1136
- 1137 Jain, L.C., Seera, M., Lim, C.P. and Balasubramaniam, P., 2014. A review of online learning in supervised neural  
1138 networks. *Neural computing and applications*, 25(3), pp.491-509.
- 1139
- 1140 Wixted, J.T., Squire, L.R., Jang, Y., Papesh, M.H., Goldinger, S.D., Kuhn, J.R., Smith, K.A., Treiman, D.M. and  
1141 Steinmetz, P.N., 2014. Sparse and distributed coding of episodic memory in neurons of the human  
1142 hippocampus. *Proceedings of the National Academy of Sciences*, 111(26), pp.9621-9626.
- 1143
- 1144 Karlsson, M.P. and Frank, L.M., 2008. Network dynamics underlying the formation of sparse, informative  
1145 representations in the hippocampus. *Journal of Neuroscience*, 28(52), pp.14271-14281.
- 1146
- 1147 Mou, X., Cheng, J., Yu, Y.S., Kee, S.E. and Ji, D., 2018. Comparing mouse and rat hippocampal place cell  
1148 activities and firing sequences in the same environments. *Frontiers in Cellular Neuroscience*, 12, p.332.
- 1149
- 1150 Tampuu, A., Matiisen, T., Ólafsdóttir, H.F., Barry, C. and Vicente, R., 2019. Efficient neural decoding of self-  
1151 location with a deep recurrent network. *PLoS computational biology*, 15(2), p.e1006822.
- 1152
- 1153 Rezaei, M.R., Gillespie, A.K., Guidera, J.A., Nazari, B., Sadri, S., Frank, L.M., Eden, U.T. and Yousefi, A., 2018,  
1154 July. A comparison study of point-process filter and deep learning performance in estimating rat position using

- 1155 an ensemble of place cells. In *2018 40th Annual International Conference of the IEEE Engineering in Medicine*  
1156 *and Biology Society (EMBC)* (pp. 4732-4735). IEEE.  
1157
- 1158 Chen, T.W., Wardill, T.J., Sun, Y., Pulver, S.R., Renninger, S.L., Baohan, A., Schreiter, E.R., Kerr, R.A., Orger,  
1159 M.B., Jayaraman, V. and Looger, L.L., 2013. Ultrasensitive fluorescent proteins for imaging neuronal  
1160 activity. *Nature*, 499(7458), pp.295-300.  
1161
- 1162 Gonzalez, W.G., Zhang, H., Harutyunyan, A. and Lois, C., 2019. Persistence of neuronal representations through  
1163 time and damage in the hippocampus. *Science*, 365(6455), pp.821-825.  
1164
- 1165 Averbeck, B.B., Latham, P.E. and Pouget, A., 2006. Neural correlations, population coding and  
1166 computation. *Nature reviews neuroscience*, 7(5), pp.358-366.  
1167
- 1168 Spiers, H.J., 2020. The Hippocampal Cognitive Map: One Space or Many?. *Trends in cognitive*  
1169 *sciences*, 24(3), pp.168-170.
- 1170 O'keefe, J. and Nadel, L., 1978. *The hippocampus as a cognitive map*. Oxford university press.
- 1171 B.A. Strange et al. Functional organization of the hippocampal longitudinal axis *Nat.*  
1172 *Rev.*  
1173 *Neurosci.* 15 (2014), pp. 655-669
- 1174 Moita, M.A., Rosis, S., Zhou, Y., LeDoux, J.E. and Blair, H.T., 2003. Hippocampal place cells acquire  
1175 location-specific responses to the conditioned stimulus during auditory fear conditioning. *Neuron*, 37(3),  
1176 pp.485-497.
- 1177 Komorowski, R.W., Manns, J.R. and Eichenbaum, H., 2009. Robust conjunctive item–place  
1178 coding by hippocampal neurons parallels learning what happens where. *Journal of*  
1179 *Neuroscience*, 29(31), pp.9918-9929.
- 1180 Harding, E.K., Boivin, B. and Salter, M.W., 2020. Intracellular calcium responses encode action  
1181 potential firing in spinal cord lamina I neurons. *Journal of Neuroscience*, 40(23), pp.4439-4456.
- 1182 Trautmann, E.M., O’Shea, D.J., Sun, X., Marshel, J.H., Crow, A., Hsueh, B., Vesuna, S., Cofer, L.,  
1183 Bohner, G., Allen, W. and Kauvar, I., 2021. Dendritic calcium signals in rhesus macaque motor cortex  
1184 drive an optical brain-computer interface. *Nature Communications*, 12(1), pp.1-20.
- 1185 Lewis, J. P., 1995. Fast Normalized Cross-Correlation. *Vision Interface*, pp. 120–123.
- 1186 Pedregosa, F., Varoquaux, G., Gramfort, A., Michel, V., Thirion, B., Grisel, O., Blondel, M., Prettenhofer,  
1187 P., Weiss, R., Dubourg, V. and Vanderplas, J., 2011. Scikit-learn: Machine learning in Python. *the*  
1188 *Journal of machine Learning research*, 12, pp.2825-2830.
- 1189 Abadi, M., Barham, P., Chen, J., Chen, Z., Davis, A., Dean, J., et al. (2016). TensorFlow: a system  
1190 for large-scale machine learning. *arXiv [preprint]*. arXiv: 1605.08695

1191 Clancy, K.B., Koralek, A.C., Costa, R.M., Feldman, D.E. and Carmena, J.M., 2014. Volitional  
1192 modulation of optically recorded calcium signals during neuroprosthetic learning. *Nature*  
1193 *neuroscience*, 17(6), pp.807-809.
